# Supplementary material for: Miga-mediated endoplasmic reticulum–mitochondria contact sites regulate neuronal homeostasis
Source: eLife. 2020 Jul 10;9:e56584. doi: 10.7554/eLife.56584 (PMC7556861; doi:10.7554/eLife.56584)
Supplement: Figure 1—source data 1. [file elife-56584-fig1-data1.xlsx]

## Sheet: Sheet1
No. of rhabdomeres per ommatidium				day 1
CTL	Miga	Marf	MitoPLD
7	5	7	6
7	5	6	7
6	3	7	7
7	6	7	7
6	4	7	6
7	5	7	7
7	5	7	7
7	5	7	7
7	6	7	7
7	5	6	7
6	4	7	6
7	5	7	6
