# Supplementary material for: Miga-mediated endoplasmic reticulum–mitochondria contact sites regulate neuronal homeostasis
Source: eLife. 2020 Jul 10;9:e56584. doi: 10.7554/eLife.56584 (PMC7556861; doi:10.7554/eLife.56584)
Supplement: Figure 1—source data 2. [file elife-56584-fig1-data2.xlsx]

## Sheet: Sheet1
No. of rhabdomeres per ommatidium				day 30
CTL	Miga	Marf	MitoPLD
6	0	5	6
7	0	6	7
6	0	4	7
7	0	5	6
7	0	4	7
6	0	5	7
6	0	6	6
6	0	6	7
7	0	5	6
5	0	4	6
7	0	5	7
6	0	5	6
