# Supplementary material for: Miga-mediated endoplasmic reticulum–mitochondria contact sites regulate neuronal homeostasis
Source: eLife. 2020 Jul 10;9:e56584. doi: 10.7554/eLife.56584 (PMC7556861; doi:10.7554/eLife.56584)
Supplement: Figure 1—source data 3. [file elife-56584-fig1-data3.xlsx]

## Sheet: Sheet1
	Area of rhabdomere(μm2)			1D
CTL	Miga	Marf	MitoPLD
1.395	0.609	2.092	1.115
1.519	1.268	1.132	1.362
1.607	1.18	2.208	0.781
1.618	0.732	2.112	1.491
1.605	0.235	1.954	1.454
2.536	0.615	1.459	0.361
1.449	0.959	1.718	0.566
1.73	1.332	1.598	2.931
1.564	1.075	0.885	2.877
1.798	0.247	1.788	3.013
1.912	0.349	0.977	2.432
1.597	0.881	1.617	2.643
1.545	0.675	1.148	2.581
1.39	0.758	1.551	1.204
1.235	0.322	1.663	2.499
1.255	0.704	1.966	1.8
3.259	0.758	0.782	1.117
3.721	0.368	0.977	1.629
4.096	0.538	2.444	2.681
3.155	1.826	2.493	1.948
1.162	0.216	2.524	1.856
2.898	0.446	2.376	0.487
2.645	0.767	2.321	2.167
2.487	1.24	1.786	1.572
2.898	0.727	2.876	2.011
1.587	0.949	2.157	1.446
2.645	0.391	2.695	1.497
