# Supplementary material for: Miga-mediated endoplasmic reticulum–mitochondria contact sites regulate neuronal homeostasis
Source: eLife. 2020 Jul 10;9:e56584. doi: 10.7554/eLife.56584 (PMC7556861; doi:10.7554/eLife.56584)
Supplement: Figure 1—source data 4. [file elife-56584-fig1-data4.xlsx]

## Sheet: Sheet1
	Area of rhabdomere(μm2)			30D
	CTL	Miga	Marf	MitoPLD
	1.583	0	1.294	2.434
	1.999	0	0.751	2.682
	2.584	0	0.751	1.85
	2.715	0	0.528	3.001
	3.308	0	1.17	3.001
	2.812	0	0.736	1.323
	1.574	0	0.84	1.852
	2.831	0	0.203	2.438
	1.047	0	1.307	2.659
	1.806	0	1.244	1.548
	2.158	0	0.898	2.982
	2.527	0	1.078	1.823
	1.993	0	0.417	1.792
	1.274	0	1.289	3.08
	3.08	0	1.303	2.673
	2.687	0	0.351	0.934
	2.134	0	0.983	2.395
	2.25	0	0.495	2.247
	2.304	0	1.379	2.337
	2.546	0	1.124	2.468
	2.402	0	0.991	1.473
	2.307	0	0.601	2.65
