# Supplementary material for: Miga-mediated endoplasmic reticulum–mitochondria contact sites regulate neuronal homeostasis
Source: eLife. 2020 Jul 10;9:e56584. doi: 10.7554/eLife.56584 (PMC7556861; doi:10.7554/eLife.56584)
Supplement: Figure 2—figure supplement 1—source data 1. [file elife-56584-fig2-figsupp1-data1.xlsx]

## Sheet: Sheet1
						Mito Perimeter/ μm
						CTL	Miga	MigaFM
						5.974	16.998	8.134
						4.755	15.737	6.68
						4.315	12.28	5.361
						4.157	10.565	5.359
						4.081	9.037	5.155
						3.903	8.775	5.12
						3.806	8.178	5.101
						3.222	7.924	4.809
						3.187	7.804	4.597
						3.035	7.484	4.044
						3.019	7.075	4.025
						2.955	6.451	4.004
						2.89	6.249	3.973
						2.756	6.193	3.874
						2.745	5.907	3.847
						2.593	5.889	3.825
						2.4	5.729	3.765
						2.396	5.483	3.569
						2.235	5.37	3.551
						2.222	5.129	3.456
						2.193	5.098	3.442
						2.163	4.743	3.346
						2.123	4.613	3.263
						2.119	4.518	3.219
						2.04	4.5	3.09
						2.018	4.425	2.993
						2.016	4.376	2.795
						1.997	4.313	2.783
						1.997	4.144	2.733
						1.923	4.136	2.733
						1.89	4.131	2.587
						1.848	4.01	2.558
						1.696	3.916	2.556
						1.693	3.859	2.529
						1.688	3.735	2.506
						1.652	3.687	2.498
						1.617	3.659	2.452
						1.617	3.545	2.436
						1.596	3.459	2.422
						1.59	3.308	2.378
						1.582	3.229	2.237
						1.533	3.002	2.145
						1.517	2.906	2.133
						1.511	2.78	2.13
						1.5	2.686	2.092
						1.492	2.474	2.072
						1.423	2.45	2.005
						1.408	2.39	1.981
						1.407	2.333	1.958
						1.394	2.264	1.884
						1.378	2.116	1.818
						1.347	2.019	1.801
						1.296	1.838	1.731
						1.292	1.734	1.686
						1.231	1.693	1.65
						1.205	1.53	1.548
						1.179	1.45	1.496
						1.162	1.318	1.358
						1.143	1.173	1.303
						0.909	1.134	1.301
