# Supplementary material for: Miga-mediated endoplasmic reticulum–mitochondria contact sites regulate neuronal homeostasis
Source: eLife. 2020 Jul 10;9:e56584. doi: 10.7554/eLife.56584 (PMC7556861; doi:10.7554/eLife.56584)
Supplement: Figure 2—source data 1. [file elife-56584-fig2-data1.xlsx]

## Sheet: Sheet1
		Mito with ER contacts/Total Mito
CTL	Vap33	Miga	Miga: Vap33	Vap33RNAi	Miga:Vap33RNAi	MigaFM
0.107143	0.307692	0.6875	0.944444	0.125	0.157895	0.1875
0.0714286	0.230769	0.677966	1	0.111111	0.142857	0.130435
0.142857	0.333333	0.694444	1	0.166667	0.192308	0.142857
0.121951	0.1875	0.612903	1	0.105263	0.142857	0.214286
0.1	0.25	0.736842	1	0.166667	0.166667	0.16
0.147059	0.3125	0.636364	0.928571	0.173913	0.1	0.156863
