# Supplementary material for: Miga-mediated endoplasmic reticulum–mitochondria contact sites regulate neuronal homeostasis
Source: eLife. 2020 Jul 10;9:e56584. doi: 10.7554/eLife.56584 (PMC7556861; doi:10.7554/eLife.56584)
Supplement: Figure 2—source data 2. [file elife-56584-fig2-data2.xlsx]

## Sheet: Sheet1
			Length of ERMCS/Mito Perimeter
CTL	Vap33	Miga	Miga: Vap33	Vap33RNAi	Miga:Vap33RNAi	MigaFM
0.117309	0.0863919	0.229092	0.690497	0.0743125	0.0989899	0.112041
0.0670573	0.0661593	0.236058	0.970076	0.160705	0.169548	0.147113
0.0539773	0.163108	0.1976	0.433081	0.112825	0.0674897	0.120275
0.0816158	0.0706436	0.208623	0.274279	0.185337	0.130006	0.122921
0.0566038	0.1304	0.254447	0.438743	0.145523	0.056051	0.0663334
0.191218	0.0450396	0.229643	0.690987	0.154034	0.0888009	0.215434
0.102347	0.0820298	0.198491	0.747435	0.109574	0.115899	0.123853
0.111283	0.0675241	0.346933	0.591986	0.119221	0.0934343	0.172595
0.0529801	0.097093	0.19052	0.374162	0.0536516	0.0780488	0.0543867
0.100942	0.0675676	0.228816	0.746908	0.101111	0.0937967	0.0692281
0.0997426	0.0918643	0.213958	0.516361	0.0718912	0.122718	0.130429
0.123001	0.0943903	0.258741	0.53981	0.152446	0.131034	0.130635
0.131273	0.130864	0.267974	0.398393	0.155886	0.0858876	0.086743
0.0617647	0.216783	0.276156	0.462311	0.178598	0.113868	0.106783
0.129064	0.258011	0.368384	0.484094	0.126745	0.126894	0.132865
0.0720339	0.209338	0.393519	0.882083	0.143246	0.128467	0.128957
