# Supplementary material for: Miga-mediated endoplasmic reticulum–mitochondria contact sites regulate neuronal homeostasis
Source: eLife. 2020 Jul 10;9:e56584. doi: 10.7554/eLife.56584 (PMC7556861; doi:10.7554/eLife.56584)
Supplement: Figure 2—source data 3. [file elife-56584-fig2-data3.xlsx]

## Sheet: Sheet1
			The distance between ER and Mito at ERMCS (nm)
CTL	Vap33	Miga	Miga: Vap33	Vap33RNAi	Miga:Vap33RNAi	MigaFM
20	21	8	6	21	19	23
25	24	9	5	21	30	26
23	27	8	12	21	27	28
23	22	8	16	19	30	26
29	22	9	9	25	30	21
22	12	9	6	18	15	16
19	14	9	3	29	11	27
22	21	12	8	20	16	21
26	15	12	9	25	22	17
29	22	11	17	23	22	23
24	22	12	12	23	27	17
20	12	8	16	16	13	25
26	24	12	12	8	30	21
23	25	9	12	9	26	28
26	28	11	16	14	19	9
29	21	14	11	20	21	12
18	21	12	15	25	18	30
21	28	13	8	19	13	24
27	18	10	14	16	25	17
18	12	8	11	16	16	27
24	15	9	13	9	25	30
23	23	12	14	24	26	28
16	18	11	14	28	17	22
16	14	13	10	20	28	17
15	19	14	10	10	28	14
20	24	13	12	9	16	25
21	26	14	11	15	21	17
22	30	14	11	9	23	20
19	14	13	12	11	27	21
19	20	11	5	10	11	11
15	30	6	8	11	15	17
11	17	9	13	29	24	19
21	12	9	12	15	25	27
15	19	12	8	24	17	26
13	14	14	8	29	29	12
19	23	8	10	24	23	16
27	16	6	8	21	23	23
23	34	7	9	17	26	25
27	24	9	7	21	25	27
27	14	11	9	24	27	23
27	30	12	9	21	27	23
29	24	10	11	18	18	26
24	15	13	11	29	18	30
30	14	18	11	22	19	28
19	24	13	9	20	20	28
19	24	14	10	25	24	30
29	22	10	10	30	21	22
30	25	14	8	26	18	20
25	24	13	17	26	26	23
27	21	13	14	30	25	23
