# Supplementary material for: Miga-mediated endoplasmic reticulum–mitochondria contact sites regulate neuronal homeostasis
Source: eLife. 2020 Jul 10;9:e56584. doi: 10.7554/eLife.56584 (PMC7556861; doi:10.7554/eLife.56584)
Supplement: Figure 2—source data 4. [file elife-56584-fig2-data4.xlsx]

## Sheet: Proteins
Checked	Protein FDR Confidence: Combined	Master	Accession	Description	Exp. q-value: Combined	Sum PEP Score	Coverage [%]	# Peptides	# PSMs	# Unique Peptides	# Protein Groups	# AAs	MW [kDa]	calc. pI	Score Sequest HT: Sequest HT	# Peptides (by Search Engine): Sequest HT
FALSE	High	Master Protein	C0HKA1	40S ribosomal protein S14b OS=Drosophila melanogaster OX=7227 GN=RpS14b PE=2 SV=1	0	52.869	50	9	20	9	1	151	16.3	10.35	35.41	9
FALSE	High	Master Protein	P84040	Histone H4 OS=Drosophila melanogaster OX=7227 GN=His4 PE=1 SV=2	0	47.318	52	8	30	8	1	103	11.4	11.36	49.68	8
FALSE	High	Master Protein	P41094	40S ribosomal protein S18 OS=Drosophila melanogaster OX=7227 GN=RpS18 PE=1 SV=1	0	45.39	52	12	27	12	1	152	17.6	10.48	31.48	12
FALSE	High	Master Protein	O01666	ATP synthase subunit gamma, mitochondrial OS=Drosophila melanogaster OX=7227 GN=ATPsyngamma PE=2 SV=2	0	43.91	43	14	31	14	1	297	32.9	9.22	42.72	14
FALSE	High	Master Protein	Q9VJ19	RE25263p OS=Drosophila melanogaster OX=7227 GN=RpL30 PE=1 SV=1	0	41.74	61	5	12	5	1	111	12.2	9.58	16.51	5
FALSE	High	Master Protein	P17704	40S ribosomal protein S17 OS=Drosophila melanogaster OX=7227 GN=RpS17 PE=1 SV=2	0	36.597	44	7	15	7	1	131	15.3	9.94	15.93	7
FALSE	High	Master Protein	P02572	Actin-42A OS=Drosophila melanogaster OX=7227 GN=Act42A PE=1 SV=3	0	36.03	35	12	22	12	1	376	41.8	5.48	20.55	12
FALSE	High	Master Protein	Q06559	40S ribosomal protein S3 OS=Drosophila melanogaster OX=7227 GN=RpS3 PE=1 SV=1	0	34.355	39	9	23	9	1	246	27.5	9.39	34.78	9
FALSE	High	Master Protein	Q7PLL3	Eukaryotic initiation factor 4B OS=Drosophila melanogaster OX=7227 GN=eIF4B PE=1 SV=1	0	34.131	27	11	16	11	1	459	52.2	6.96	18.04	11
FALSE	High	Master Protein	Q9V9M7	RE62581p OS=Drosophila melanogaster OX=7227 GN=RpL21 PE=1 SV=1	0	34.108	18	4	11	4	1	159	18.5	10.55	19.29	4
FALSE	High	Master Protein	Q9VWG3	40S ribosomal protein S10b OS=Drosophila melanogaster OX=7227 GN=RpS10b PE=1 SV=2	0	31.86	38	6	15	6	1	160	17.9	9.8	21.01	6
FALSE	High	Master Protein	A0A0B4LG52	GEO08239p1 OS=Drosophila melanogaster OX=7227 GN=RpS16 PE=2 SV=1	0	31.553	50	12	22	12	1	148	16.8	10.17	20.41	12
FALSE	High	Master Protein	Q9VQS4	Spindly OS=Drosophila melanogaster OX=7227 GN=Spindly PE=4 SV=2	0	31.166	19	12	15	12	1	781	88.6	6.27	3.96	12
FALSE	High	Master Protein	P11147	Heat shock 70 kDa protein cognate 4 OS=Drosophila melanogaster OX=7227 GN=Hsc70-4 PE=1 SV=3	0	30.025	18	10	17	7	1	651	71.1	5.52	17.74	10
FALSE	High	Master Protein	P55841	60S ribosomal protein L14 OS=Drosophila melanogaster OX=7227 GN=RpL14 PE=1 SV=1	0	28.67	38	9	14	9	1	166	19.2	11.18	15.57	9
FALSE	High	Master Protein	Q9W1B9	GEO07602p1 OS=Drosophila melanogaster OX=7227 GN=RpL12 PE=1 SV=1	0	28.35	43	6	11	6	1	165	17.7	9.07	12.59	6
FALSE	High	Master Protein	P55830	40S ribosomal protein S3a OS=Drosophila melanogaster OX=7227 GN=RpS3A PE=1 SV=4	0	27.887	39	12	16	12	1	268	30.3	9.61	15.9	12
FALSE	High	Master Protein	Q9VA91	40S ribosomal protein S7 OS=Drosophila melanogaster OX=7227 GN=RpS7 PE=1 SV=1	0	27.035	34	8	13	8	1	194	22.2	9.8	15.75	8
FALSE	High	Master Protein	Q9VBN5	60S ribosomal protein L27 OS=Drosophila melanogaster OX=7227 GN=RpL27 PE=1 SV=1	0	26.92	39	5	13	5	1	135	15.9	10.61	17.54	5
FALSE	High	Master Protein	Q9W5R8	60S ribosomal protein L5 OS=Drosophila melanogaster OX=7227 GN=RpL5 PE=1 SV=2	0	25.121	27	8	9	8	1	299	34	9.77	12.49	8
FALSE	High	Master Protein	Q0E9B6	40S ribosomal protein S11 OS=Drosophila melanogaster OX=7227 GN=RpS11 PE=1 SV=1	0	23.138	41	8	11	8	1	155	18.1	10.93	12.51	8
FALSE	High	Master Protein	C6SUW3	LD13662p OS=Drosophila melanogaster OX=7227 GN=RpS9 PE=1 SV=1	0	22.994	41	9	14	9	1	195	22.6	10.61	21.47	9
FALSE	High	Master Protein	P55828	40S ribosomal protein S20 OS=Drosophila melanogaster OX=7227 GN=RpS20 PE=1 SV=1	0	22.833	24	3	8	3	1	120	13.5	10.33	11.81	3
FALSE	High	Master Protein	P02283	Histone H2B OS=Drosophila melanogaster OX=7227 GN=His2B PE=1 SV=2	0	22.394	46	6	11	6	1	123	13.7	10.35	15.84	6
FALSE	High	Master Protein	Q26365	ADP,ATP carrier protein OS=Drosophila melanogaster OX=7227 GN=sesB PE=2 SV=4	0	22.361	31	10	12	10	1	312	34.2	9.8	11.59	10
FALSE	High	Master Protein	Q03334	40S ribosomal protein S13 OS=Drosophila melanogaster OX=7227 GN=RpS13 PE=1 SV=3	0	22.285	32	6	11	6	1	151	17.2	10.55	7.99	6
FALSE	High	Master Protein	Q9VBU9	40S ribosomal protein S27 OS=Drosophila melanogaster OX=7227 GN=RpS27 PE=1 SV=1	0	21.841	39	4	9	4	1	84	9.4	9.52	10.54	4
FALSE	High	Master Protein	P48149	40S ribosomal protein S15Aa OS=Drosophila melanogaster OX=7227 GN=RpS15Aa PE=1 SV=2	0	21.809	38	5	10	5	1	130	14.8	9.8	10.9	5
FALSE	High	Master Protein	P50887	60S ribosomal protein L22 OS=Drosophila melanogaster OX=7227 GN=RpL22 PE=1 SV=2	0	21.802	36	7	11	7	1	299	30.6	10.11	10.16	7
FALSE	High	Master Protein	Q9VNE9	60S ribosomal protein L13a OS=Drosophila melanogaster OX=7227 GN=RpL13A PE=1 SV=1	0	20.978	25	5	7	5	1	205	23.6	11.03	6.75	5
FALSE	High	Master Protein	P48159	60S ribosomal protein L23 OS=Drosophila melanogaster OX=7227 GN=RpL23 PE=1 SV=2	0	20.527	40	4	8	4	1	140	14.9	10.83	11.93	4
FALSE	High	Master Protein	A0A0B4KI34	CIN85 and CD2AP related, isoform J OS=Drosophila melanogaster OX=7227 GN=cindr PE=1 SV=1	0	20.515	9	6	7	6	1	941	98.5	9.36	10.75	6
FALSE	High	Master Protein	Q9V3G1	60S ribosomal protein L8 OS=Drosophila melanogaster OX=7227 GN=RpL8 PE=1 SV=1	0	19.691	14	3	9	3	1	256	27.9	11.15	7.39	3
FALSE	High	Master Protein	Q9VZS5	60S ribosomal protein L28 OS=Drosophila melanogaster OX=7227 GN=RpL28 PE=1 SV=1	0	19.566	38	6	8	6	1	144	16	11.09	11.12	6
FALSE	High	Master Protein	Q9W3W8	60S ribosomal protein L17 OS=Drosophila melanogaster OX=7227 GN=RpL17 PE=1 SV=1	0	19.053	17	4	10	4	1	186	21.6	10.3	16.54	4
FALSE	High	Master Protein	Q9VV75	AT02348p OS=Drosophila melanogaster OX=7227 GN=UQCR-C2 PE=1 SV=1	0	18.568	14	5	6	5	1	440	45.4	9.44	5.38	5
FALSE	High	Master Protein	Q9W4N8	LD30122p OS=Drosophila melanogaster OX=7227 GN=Vap33 PE=1 SV=1	0	18.521	23	7	8	7	1	269	29.5	7.78	8.51	7
FALSE	High	Master Protein	Q9VF08	Mitochondrial import inner membrane translocase subunit Tim16 OS=Drosophila melanogaster OX=7227 GN=blp PE=2 SV=1	0	18.502	40	5	8	5	1	141	15.7	9.6	9.48	5
FALSE	High	Master Protein	P39018	40S ribosomal protein S19a OS=Drosophila melanogaster OX=7227 GN=RpS19a PE=1 SV=3	0	18.38	44	8	12	8	1	156	17.3	10.11	10.16	8
FALSE	High	Master Protein	Q9W1H8	GH13256p OS=Drosophila melanogaster OX=7227 GN=Mtpbeta PE=1 SV=1	0	18.327	14	7	10	7	1	469	50.6	9.14	18.48	7
FALSE	High	Master Protein	P46222	60S ribosomal protein L11 OS=Drosophila melanogaster OX=7227 GN=RpL11 PE=1 SV=2	0	18.014	27	6	11	6	1	184	21.1	10.02	15.8	6
FALSE	High	Master Protein	Q9VVU2	GEO07453p1 OS=Drosophila melanogaster OX=7227 GN=RpL26 PE=1 SV=1	0	18.008	40	8	13	8	1	149	17.3	10.95	16.62	8
FALSE	High	Master Protein	P46223	60S ribosomal protein L7a OS=Drosophila melanogaster OX=7227 GN=RpL7A PE=1 SV=2	0	17.76	25	7	9	7	1	271	30.7	10.71	5.77	7
FALSE	High	Master Protein	Q7JQT8	LD41464p OS=Drosophila melanogaster OX=7227 GN=Dmel\CG17002 PE=1 SV=1	0	17.756	11	4	5	4	1	421	46.5	9.48	7.19	4
FALSE	High	Master Protein	X2JC79	Eukaryotic translation initiation factor 4H1, isoform D OS=Drosophila melanogaster OX=7227 GN=eIF4H1 PE=1 SV=1	0	17.504	15	5	5	5	1	388	41.7	9.79	3.87	5
FALSE	High	Master Protein	Q9VFV9	DnaJ-like-2, isoform A OS=Drosophila melanogaster OX=7227 GN=Droj2 PE=1 SV=1	0	17.035	18	6	6	6	1	403	45.2	6.48	7.71	6
FALSE	High	Master Protein	P54397	39 kDa FK506-binding nuclear protein OS=Drosophila melanogaster OX=7227 GN=FK506-bp1 PE=1 SV=2	0	17.022	14	6	7	6	1	357	39.3	4.79	8.11	6
FALSE	High	Master Protein	A1ZBL0	Tubulin beta chain OS=Drosophila melanogaster OX=7227 GN=betaTub56D PE=1 SV=1	0	16.856	13	5	10	5	1	456	51.3	5.01	10.89	5
FALSE	High	Master Protein	X2JF59	Thioredoxin peroxidase 1, isoform C OS=Drosophila melanogaster OX=7227 GN=Jafrac1 PE=1 SV=1	0	16.61	19	3	5	3	1	194	21.7	5.71	6.04	3
FALSE	High	Master Protein	P41042	40S ribosomal protein S4 OS=Drosophila melanogaster OX=7227 GN=RpS4 PE=1 SV=2	0	16.521	25	6	9	6	1	261	29.1	10.18	1.96	6
FALSE	High	Master Protein	Q9VNZ3	DNA-directed RNA polymerases I, II, and III subunit RPABC3 OS=Drosophila melanogaster OX=7227 GN=Rpb8 PE=1 SV=1	0	15.657	21	3	4	3	1	149	17.2	4.93	7.06	3
FALSE	High	Master Protein	P29844	Endoplasmic reticulum chaperone BiP OS=Drosophila melanogaster OX=7227 GN=Hsc70-3 PE=1 SV=2	0	14.814	9	5	7	2	1	656	72.2	5.36	6.63	5
FALSE	High	Master Protein	Q9VS34	60S ribosomal protein L18 OS=Drosophila melanogaster OX=7227 GN=RpL18 PE=1 SV=1	0	14.411	24	4	5	4	1	188	21.7	11.53	3.49	4
FALSE	High	Master Protein	P15357	Ubiquitin-40S ribosomal protein S27a OS=Drosophila melanogaster OX=7227 GN=RpS27A PE=1 SV=2	0	14.317	32	4	8	4	1	156	17.9	9.77	6.3	4
FALSE	High	Master Protein	A8DYI6	Prohibitin 2, isoform E OS=Drosophila melanogaster OX=7227 GN=Phb2 PE=1 SV=1	0	14.063	18	6	6	6	1	338	37.3	9.54	5	6
FALSE	High	Master Protein	P09180	60S ribosomal protein L4 OS=Drosophila melanogaster OX=7227 GN=RpL4 PE=1 SV=2	0	13.882	16	7	9	7	1	401	45	11.47	6.96	7
FALSE	High	Master Protein	P48588	40S ribosomal protein S25 OS=Drosophila melanogaster OX=7227 GN=RpS25 PE=1 SV=3	0	13.722	21	2	6	2	1	117	13.2	10.27	8.4	2
FALSE	High	Master Protein	Q9VH64	LD29322p OS=Drosophila melanogaster OX=7227 GN=Dmel\CG8507 PE=1 SV=1	0	13.512	13	5	5	5	1	379	44.6	8.15	5.1	5
FALSE	High	Master Protein	Q95RJ9	F-box-like/WD repeat-containing protein ebi OS=Drosophila melanogaster OX=7227 GN=ebi PE=1 SV=2	0	13.385	10	7	9	7	1	700	72.3	5.88	4.09	7
FALSE	High	Master Protein	X2JC35	60S ribosomal protein L36 OS=Drosophila melanogaster OX=7227 GN=RpL36 PE=2 SV=1	0	13.113	20	4	8	4	1	115	13.5	11.37	17.5	4
FALSE	High	Master Protein	Q9VAY2	Glycoprotein 93 OS=Drosophila melanogaster OX=7227 GN=Gp93 PE=1 SV=1	0	13.082	5	3	3	2	1	787	90.2	5.02	4.89	3
FALSE	High	Master Protein	P08736	Elongation factor 1-alpha 1 OS=Drosophila melanogaster OX=7227 GN=eEF1alpha1 PE=1 SV=2	0	13.047	13	6	12	6	1	463	50.3	9.07	13.23	6
FALSE	High	Master Protein	Q9W2X6	ATP synthase, delta subunit, isoform A OS=Drosophila melanogaster OX=7227 GN=ATPsyndelta PE=1 SV=1	0	12.818	14	3	5	3	1	157	16.7	5.99	7.12	3
FALSE	High	Master Protein	Q9VC93	Dis3, isoform A OS=Drosophila melanogaster OX=7227 GN=Dis3 PE=1 SV=1	0	12.737	6	6	6	6	1	982	112.1	6.68	7.4	6
FALSE	High	Master Protein	O02195	Eukaryotic translation initiation factor 3 subunit I OS=Drosophila melanogaster OX=7227 GN=eIF3i PE=1 SV=1	0	12.557	16	4	4	4	1	326	36.1	5.34	3.75	4
FALSE	High	Master Protein	A0A4D6K1L3	Cut up, isoform F OS=Drosophila melanogaster OX=7227 GN=ctp PE=4 SV=1	0	12.502	8	2	4	2	1	267	31.1	4.64	4.32	2
FALSE	High	Master Protein	A0A0B4LFD9	GEO04460p1 OS=Drosophila melanogaster OX=7227 GN=RpS23 PE=2 SV=1	0	12.484	29	4	4	4	1	143	16	10.59	10.22	4
FALSE	High	Master Protein	Q29QQ9	IP10364p OS=Drosophila melanogaster OX=7227 GN=Rrp42 PE=1 SV=1	0	11.69	13	3	4	3	1	296	32.4	5.11	4.21	3
FALSE	High	Master Protein	Q9W3F7	Mitoguardin OS=Drosophila melanogaster OX=7227 GN=Miga PE=1 SV=2	0	11.6	7	3	5	3	1	525	59	5.68	4.94	3
FALSE	High	Master Protein	Q9V397	BcDNA.GH12558 OS=Drosophila melanogaster OX=7227 GN=Mtpalpha PE=1 SV=1	0	11.553	7	5	6	5	1	783	84	9.17	3.93	5
FALSE	High	Master Protein	P04359	60S ribosomal protein L32 OS=Drosophila melanogaster OX=7227 GN=RpL32 PE=1 SV=3	0	11.353	39	5	8	5	1	134	16	11.4	3.71	5
FALSE	High	Master Protein	P92177	14-3-3 protein epsilon OS=Drosophila melanogaster OX=7227 GN=14-3-3epsilon PE=1 SV=2	0	11.181	13	4	5	4	1	262	29.8	4.78	5.61	4
FALSE	High	Master Protein	Q9VLU0	Barrier-to-autointegration factor OS=Drosophila melanogaster OX=7227 GN=baf PE=1 SV=1	0	11.071	40	4	5	4	1	90	10.1	5.16	7.56	4
FALSE	High	Master Protein	Q9Y140	Dehydrogenase/reductase SDR family protein 7-like OS=Drosophila melanogaster OX=7227 GN=CG7601 PE=2 SV=1	0	11.005	12	3	3	3	1	326	35.7	9.26	4.31	3
FALSE	High	Master Protein	Q9V9W3	RE08669p OS=Drosophila melanogaster OX=7227 GN=RpL6 PE=1 SV=1	0	10.988	11	4	5	4	1	262	29.7	10.71	4.16	4
FALSE	High	Master Protein	X2JDU0	Ribosomal protein L9, isoform C OS=Drosophila melanogaster OX=7227 GN=RpL9 PE=4 SV=1	0	10.649	18	4	5	4	1	190	21.4	9.69	1.66	4
FALSE	High	Master Protein	A0A0B4K6N1	40S ribosomal protein S8 OS=Drosophila melanogaster OX=7227 GN=RpS8 PE=3 SV=1	0	10.546	24	4	5	4	1	208	23.7	10.48	6.57	4
FALSE	High	Master Protein	P06604	Tubulin alpha-2 chain OS=Drosophila melanogaster OX=7227 GN=alphaTub85E PE=1 SV=1	0	10.451	9	4	8	1	1	449	49.9	5.2	7.56	4
FALSE	High	Master Protein	Q95PE4	GEO07784p1 OS=Drosophila melanogaster OX=7227 GN=Mpp6 PE=2 SV=1	0	10.294	19	3	6	3	1	162	18.5	9.48	8	3
FALSE	High	Master Protein	P41126	60S ribosomal protein L13 OS=Drosophila melanogaster OX=7227 GN=RpL13 PE=1 SV=1	0	10.151	15	4	4	4	1	218	24.9	10.99	1.62	4
FALSE	High	Master Protein	A0A140SRF8	Uncharacterized protein, isoform C OS=Drosophila melanogaster OX=7227 GN=Dmel\CG11857 PE=1 SV=1	0	10.098	11	2	3	2	1	265	29.7	8.94	4.75	2
FALSE	High	Master Protein	P21187	Polyadenylate-binding protein OS=Drosophila melanogaster OX=7227 GN=pAbp PE=1 SV=3	0	9.984	4	3	4	3	1	634	69.9	9.31	1.66	3
FALSE	High	Master Protein	Q9VXN2	Protein stunted OS=Drosophila melanogaster OX=7227 GN=sun PE=1 SV=1	0	9.842	44	2	3	2	1	61	6.8	10.59	6.2	2
FALSE	High	Master Protein	Q9VPR1	GH02075p OS=Drosophila melanogaster OX=7227 GN=Tspo PE=1 SV=1	0	9.73	21	3	3	3	1	185	20.1	9.45	1.96	3
FALSE	High	Master Protein	O16797	60S ribosomal protein L3 OS=Drosophila melanogaster OX=7227 GN=RpL3 PE=1 SV=3	0	9.645	11	5	5	5	1	416	46.9	10.24	5.7	5
FALSE	High	Master Protein	Q9VKM7	AT01533p OS=Drosophila melanogaster OX=7227 GN=CG6089 PE=1 SV=2	0	9.532	4	2	3	2	1	677	75.6	9.44	4.26	2
FALSE	High	Master Protein	Q9W0A8	FI01658p OS=Drosophila melanogaster OX=7227 GN=RpL23A PE=1 SV=1	0	9.377	16	4	4	4	1	277	29.4	10.95	4.35	4
FALSE	High	Master Protein	Q9VK19	FI07225p OS=Drosophila melanogaster OX=7227 GN=Ski6 PE=1 SV=1	0	9.304	13	3	3	3	1	246	27	6.07	4.68	3
FALSE	High	Master Protein	P31009	40S ribosomal protein S2 OS=Drosophila melanogaster OX=7227 GN=RpS2 PE=1 SV=2	0	9.259	21	5	6	5	1	267	28.9	10.15	3.85	5
FALSE	High	Master Protein	M9PBL3	Heat shock protein 83, isoform B OS=Drosophila melanogaster OX=7227 GN=Hsp83 PE=3 SV=1	0	9.222	5	3	3	2	1	717	81.8	5.02	4.43	3
FALSE	High	Master Protein	A0A0B4KH25	Histone H2A OS=Drosophila melanogaster OX=7227 GN=His2Av PE=3 SV=1	0	9.169	28	4	7	4	1	141	15	10.24	7.55	4
FALSE	High	Master Protein	Q8MT77	LD28489p OS=Drosophila melanogaster OX=7227 GN=CG17338 PE=2 SV=1	0	9.145	2	3	3	3	1	1307	145.7	7.99	2.73	3
FALSE	High	Master Protein	Q8T4C9	AT03632p OS=Drosophila melanogaster OX=7227 GN=Dmel\CG6310 PE=1 SV=1	0	9.087	15	3	3	3	1	193	22.4	9.31	3.56	3
FALSE	High	Master Protein	Q9W111	Epidermal growth factor receptor pathway substrate clone 15, isoform A OS=Drosophila melanogaster OX=7227 GN=Eps-15 PE=1 SV=2	0	9.016	4	5	5	5	1	1253	134.3	5.21	3.3	5
FALSE	High	Master Protein	A0A0B4LFZ4	TER94, isoform E OS=Drosophila melanogaster OX=7227 GN=TER94 PE=1 SV=1	0	8.901	4	5	7	5	1	825	91.9	5.38	0	5
FALSE	High	Master Protein	P41093	60S ribosomal protein L18a OS=Drosophila melanogaster OX=7227 GN=RpL18A PE=1 SV=1	0	8.876	18	3	7	3	1	177	21	10.62	12.31	3
FALSE	High	Master Protein	Q7K1V5	Protein jagunal OS=Drosophila melanogaster OX=7227 GN=jagn PE=1 SV=1	0	8.86	14	2	2	2	1	197	23	6.77	3.66	2
FALSE	High	Master Protein	P06603	Tubulin alpha-1 chain OS=Drosophila melanogaster OX=7227 GN=alphaTub84B PE=1 SV=1	0	8.754	9	4	8	1	1	450	49.9	5.14	5.83	4
FALSE	High	Master Protein	Q9W499	FI02809p OS=Drosophila melanogaster OX=7227 GN=RpL35 PE=1 SV=2	0	8.734	17	2	3	2	1	123	14.4	11.18	4.49	2
FALSE	High	Master Protein	M9NE89	Lamin, isoform B OS=Drosophila melanogaster OX=7227 GN=Lam PE=3 SV=1	0	8.728	5	4	4	4	1	622	71.3	6.47	3.45	4
FALSE	High	Master Protein	X2J5T3	Rab6, isoform B OS=Drosophila melanogaster OX=7227 GN=Rab6 PE=1 SV=1	0	8.72	21	4	5	4	1	208	23.5	5.36	1.86	4
FALSE	High	Master Protein	Q9VZI2	Activated Cdc42 kinase OS=Drosophila melanogaster OX=7227 GN=Ack PE=2 SV=2	0	8.643	3	3	3	3	1	1073	118.3	7.23	4.14	3
FALSE	High	Master Protein	Q9VTP4	60S ribosomal protein L10a-2 OS=Drosophila melanogaster OX=7227 GN=RpL10Ab PE=1 SV=2	0	8.626	17	4	5	4	1	217	24.3	9.86	2.28	4
FALSE	High	Master Protein	Q7KLX3	GEO05407p1 OS=Drosophila melanogaster OX=7227 GN=Tapdelta PE=1 SV=1	0	8.443	19	3	3	3	1	166	17.6	8.54	4.93	3
FALSE	High	Master Protein	P45594	Cofilin/actin-depolymerizing factor homolog OS=Drosophila melanogaster OX=7227 GN=tsr PE=1 SV=1	0	8.126	15	2	4	2	1	148	17.1	7.17	6.22	2
FALSE	High	Master Protein	Q9W255	GH05812p OS=Drosophila melanogaster OX=7227 GN=qkr58E-1 PE=1 SV=1	0	8.029	7	4	4	4	1	396	45.4	9.07	0	4
FALSE	High	Master Protein	Q9W1M9	Rrp4, isoform A OS=Drosophila melanogaster OX=7227 GN=Rrp4 PE=1 SV=1	0	8.006	10	3	5	3	1	298	33.6	6.19	0	3
FALSE	High	Master Protein	P29327	40S ribosomal protein S6 OS=Drosophila melanogaster OX=7227 GN=RpS6 PE=1 SV=1	0	7.93	16	4	5	4	1	248	28.4	10.74	5.83	4
FALSE	High	Master Protein	P61209	ADP-ribosylation factor 1 OS=Drosophila melanogaster OX=7227 GN=Arf79F PE=1 SV=2	0	7.901	16	3	4	2	1	182	20.7	6.58	3.73	3
FALSE	High	Master Protein	Q24154	60S ribosomal protein L29 OS=Drosophila melanogaster OX=7227 GN=RpL29 PE=1 SV=1	0	7.827	16	3	4	3	1	76	8.9	11.34	1.66	3
FALSE	High	Master Protein	P40945	ADP-ribosylation factor 2 OS=Drosophila melanogaster OX=7227 GN=Arf102F PE=2 SV=2	0	7.652	18	3	4	2	1	180	20.6	7.39	4.06	3
FALSE	High	Master Protein	Q9VLQ1	Dolichyl-phosphate beta-glucosyltransferase OS=Drosophila melanogaster OX=7227 GN=wol PE=1 SV=1	0	7.553	10	3	3	3	1	326	37.1	8.06	3.79	3
FALSE	High	Master Protein	X2J5G6	Ribosomal protein L7, isoform B OS=Drosophila melanogaster OX=7227 GN=RpL7 PE=4 SV=1	0	7.531	15	5	5	5	1	252	29.5	10.89	4.04	5
FALSE	High	Master Protein	Q9VGZ2	FI06805p OS=Drosophila melanogaster OX=7227 GN=Rrp46 PE=1 SV=3	0	7.395	17	4	4	4	1	233	25.7	5.33	1.66	4
FALSE	High	Master Protein	P20240	Otefin OS=Drosophila melanogaster OX=7227 GN=Ote PE=1 SV=2	0	7.299	9	3	3	3	1	424	46.6	9.55	1.71	3
FALSE	High	Master Protein	Q9VN21	LD30155p OS=Drosophila melanogaster OX=7227 GN=lost PE=1 SV=1	0	7.216	6	3	3	3	1	545	59.7	9.06	2.02	3
FALSE	High	Master Protein	Q9V3E7	LD24793p OS=Drosophila melanogaster OX=7227 GN=Ref1 PE=1 SV=1	0	7.211	13	3	3	3	1	266	27.8	10.55	2.44	3
FALSE	High	Master Protein	Q9VFF3	Rrp6, isoform B OS=Drosophila melanogaster OX=7227 GN=Rrp6 PE=1 SV=3	0	7.173	3	3	4	3	1	900	102.9	9.25	3.12	3
FALSE	High	Master Protein	P13008	40S ribosomal protein S26 OS=Drosophila melanogaster OX=7227 GN=RpS26 PE=1 SV=1	0	7.156	18	2	4	2	1	114	13.3	11.15	6.87	2
FALSE	High	Master Protein	Q94901	RNA-binding protein lark OS=Drosophila melanogaster OX=7227 GN=lark PE=1 SV=1	0	7.149	11	4	4	4	1	352	39.9	9.07	1.75	4
FALSE	High	Master Protein	Q8MRW1	SD19278p OS=Drosophila melanogaster OX=7227 GN=Tim23 PE=1 SV=1	0	7.063	28	3	4	3	1	206	22.1	9	1.76	3
FALSE	High	Master Protein	M9ND00	Dynamin associated protein 160, isoform D OS=Drosophila melanogaster OX=7227 GN=Dap160 PE=1 SV=1	0	6.975	4	4	4	4	1	1190	131.6	5.52	1.93	4
FALSE	High	Master Protein	A4V4A5	GTP-binding nuclear protein OS=Drosophila melanogaster OX=7227 GN=Ran PE=1 SV=1	0	6.947	16	3	3	3	1	216	24.7	7.81	2.41	3
FALSE	High	Master Protein	Q9VI10	Probable small nuclear ribonucleoprotein Sm D2 OS=Drosophila melanogaster OX=7227 GN=SmD2 PE=1 SV=1	0	6.803	24	3	5	3	1	119	13.5	9.95	6.63	3
FALSE	High	Master Protein	O44434	QKR58E-3 OS=Drosophila melanogaster OX=7227 GN=qkr58E-3 PE=1 SV=1	0	6.794	9	3	3	3	1	317	36.7	8.95	1.78	3
FALSE	High	Master Protein	Q9VPQ2	DnaJ homolog shv OS=Drosophila melanogaster OX=7227 GN=shv PE=1 SV=1	0	6.778	6	2	2	2	1	354	40.2	5.67	2.41	2
FALSE	High	Master Protein	Q7K274	LD15586p OS=Drosophila melanogaster OX=7227 GN=l(2)k09913 PE=1 SV=1	0	6.711	6	3	4	3	1	389	44.1	9.5	2.04	3
FALSE	High	Master Protein	P40946	ADP-ribosylation factor 6 OS=Drosophila melanogaster OX=7227 GN=Arf51F PE=2 SV=3	0	6.666	18	3	3	3	1	175	20	8.98	3.36	3
FALSE	High	Master Protein	Q9VMU4	60S ribosomal protein L37a OS=Drosophila melanogaster OX=7227 GN=RpL37A PE=1 SV=3	0	6.512	27	3	5	3	1	92	10.3	10.61	5.54	3
FALSE	High	Master Protein	P36241	60S ribosomal protein L19 OS=Drosophila melanogaster OX=7227 GN=RpL19 PE=1 SV=2	0	6.49	9	2	3	2	1	203	24	11	0	2
FALSE	High	Master Protein	Q9I7S8	Multifunctional protein ADE2 OS=Drosophila melanogaster OX=7227 GN=ade5 PE=2 SV=2	0	6.435	6	2	3	2	1	429	47.3	8.07	0	2
FALSE	High	Master Protein	Q9VXL4	LD38104p OS=Drosophila melanogaster OX=7227 GN=Rrp47 PE=1 SV=1	0	6.367	16	3	4	3	1	159	18.1	6.2	4.51	3
FALSE	High	Master Protein	Q7JZW2	GEO07301p1 OS=Drosophila melanogaster OX=7227 GN=RpS15 PE=1 SV=1	0	6.308	30	4	4	4	1	148	17	10.26	0	4
FALSE	High	Master Protein	O77134	9 kD basic protein OS=Drosophila melanogaster OX=7227 GN=ATPsynE PE=1 SV=1	0	6.28	14	1	2	1	1	81	9	10.07	1.75	1
FALSE	High	Master Protein	Q99323	Myosin heavy chain, non-muscle OS=Drosophila melanogaster OX=7227 GN=zip PE=1 SV=2	0	6.258	1	3	3	3	1	2057	236.5	5.68	0	3
FALSE	High	Master Protein	Q9W5N2	60S ribosomal protein L38 OS=Drosophila melanogaster OX=7227 GN=RpL38 PE=1 SV=1	0	6.246	31	3	3	3	1	70	8.2	10.29	0	3
FALSE	High	Master Protein	M9PFR6	Multiprotein bridging factor 1, isoform E OS=Drosophila melanogaster OX=7227 GN=mbf1 PE=1 SV=1	0	6.194	12	3	4	3	1	188	20.4	10.23	3.74	3
FALSE	High	Master Protein	C9QP42	Eukaryotic translation initiation factor 4A, isoform E OS=Drosophila melanogaster OX=7227 GN=eIF4A PE=1 SV=1	0	6.154	10	3	3	2	1	403	45.8	5.66	0	3
FALSE	High	Master Protein	Q9VMR0	GM05057p OS=Drosophila melanogaster OX=7227 GN=Dmel\CG7382 PE=1 SV=1	0	6.078	14	3	3	3	1	236	26.6	9.98	1.9	3
FALSE	High	Master Protein	M9PJN8	Glyceraldehyde-3-phosphate dehydrogenase OS=Drosophila melanogaster OX=7227 GN=Gapdh2 PE=3 SV=1	0	6.075	9	3	5	3	1	332	35.3	8.44	0	3
FALSE	High	Master Protein	O44437	Small nuclear ribonucleoprotein Sm D3 OS=Drosophila melanogaster OX=7227 GN=SmD3 PE=1 SV=1	0	6.044	13	2	3	2	1	151	15.6	10.54	7.08	2
FALSE	High	Master Protein	Q9VPQ7	SD07518p OS=Drosophila melanogaster OX=7227 GN=Spp PE=1 SV=1	0	5.939	2	1	3	1	1	389	43.2	9.33	2.39	1
FALSE	High	Master Protein	Q8STG9	DSec61alpha OS=Drosophila melanogaster OX=7227 GN=Sec61alpha PE=1 SV=1	0	5.934	4	2	2	2	1	476	52.2	8.24	3.9	2
FALSE	High	Master Protein	Q8SY53	GH11935p OS=Drosophila melanogaster OX=7227 GN=Ostgamma PE=1 SV=1	0	5.874	8	3	3	3	1	330	37	9.96	2.06	3
FALSE	High	Master Protein	Q9W229	40S ribosomal protein S24 OS=Drosophila melanogaster OX=7227 GN=RpS24 PE=1 SV=1	0	5.853	19	3	3	3	1	131	15	11.22	0	3
FALSE	High	Master Protein	Q9W3C1	RNA cytidine acetyltransferase OS=Drosophila melanogaster OX=7227 GN=l(1)G0020 PE=1 SV=2	0	5.847	4	4	4	4	1	1008	112.8	8.53	4.04	4
FALSE	High	Master Protein	A0A0B4JD46	CCHC-type zinc finger nucleic acid binding protein, isoform B OS=Drosophila melanogaster OX=7227 GN=CNBP PE=2 SV=1	0	5.823	18	3	3	3	1	165	17.6	8.65	1.8	3
FALSE	High	Master Protein	Q9VZL3	Sc2 OS=Drosophila melanogaster OX=7227 GN=Sc2 PE=1 SV=1	0	5.817	5	2	4	2	1	302	34.2	9.61	3.56	2
FALSE	High	Master Protein	Q27294	RNA-binding protein cabeza OS=Drosophila melanogaster OX=7227 GN=caz PE=2 SV=2	0	5.766	4	1	1	1	1	399	38.8	9.36	3.13	1
FALSE	High	Master Protein	Q7KM15	Transcription factor BTF3 OS=Drosophila melanogaster OX=7227 GN=bic PE=1 SV=1	0	5.64	19	3	3	3	1	169	17.7	7.49	4.07	3
FALSE	High	Master Protein	D2NUK9	Ribonucloprotein OS=Drosophila melanogaster OX=7227 GN=hoip PE=1 SV=1	0	5.572	9	1	2	1	1	127	13.9	7.09	5.33	1
FALSE	High	Master Protein	X2JE06	GEO07624p1 OS=Drosophila melanogaster OX=7227 GN=RpL24 PE=1 SV=1	0	5.565	17	3	4	3	1	155	17.5	11.06	4.26	3
FALSE	High	Master Protein	Q9U9Q4	Eukaryotic translation initiation factor 3 subunit H OS=Drosophila melanogaster OX=7227 GN=eIF3h PE=1 SV=2	0	5.554	5	2	2	2	1	338	38.4	6.1	1.95	2
FALSE	High	Master Protein	Q9VWH4	Probable isocitrate dehydrogenase [NAD] subunit alpha, mitochondrial OS=Drosophila melanogaster OX=7227 GN=Idh3a PE=2 SV=1	0	5.519	5	2	2	2	1	377	40.8	7.36	2.53	2
FALSE	High	Master Protein	Q7JZN0	Protein transport protein Sec61 subunit beta OS=Drosophila melanogaster OX=7227 GN=Sec61beta PE=1 SV=1	0	5.5	22	2	3	2	1	100	10.2	11.65	0	2
FALSE	High	Master Protein	O17445	60S ribosomal protein L15 OS=Drosophila melanogaster OX=7227 GN=RpL15 PE=1 SV=1	0	5.488	12	3	5	3	1	204	24.3	11.47	1.83	3
FALSE	High	Master Protein	M9MRT6	Rap1 GTPase, isoform B OS=Drosophila melanogaster OX=7227 GN=Rap1 PE=4 SV=1	0	5.469	15	3	4	3	1	184	20.9	6.68	1.86	3
FALSE	High	Master Protein	Q7JYX5	RH15778p OS=Drosophila melanogaster OX=7227 GN=Vamp7 PE=1 SV=1	0	5.464	6	1	1	1	1	218	24.9	8.53	2.28	1
FALSE	High	Master Protein	Q9VY87	Cathepsin B1, isoform A OS=Drosophila melanogaster OX=7227 GN=CtsB1 PE=1 SV=1	0	5.458	5	2	3	2	1	340	37.4	6.61	0	2
FALSE	High	Master Protein	Q9VEA1	Eukaryotic translation initiation factor 1A, isoform A OS=Drosophila melanogaster OX=7227 GN=eIF1A PE=1 SV=1	0	5.116	14	2	2	2	1	148	17.1	5.22	1.81	2
FALSE	High	Master Protein	Q9VFE4	40S ribosomal protein S5b OS=Drosophila melanogaster OX=7227 GN=RpS5b PE=2 SV=1	0	5.111	14	3	3	3	1	230	25.7	8.54	3.56	3
FALSE	High	Master Protein	Q9VEX6	ATPase family AAA domain-containing protein 3A homolog OS=Drosophila melanogaster OX=7227 GN=bor PE=1 SV=2	0	5.097	3	2	2	2	1	604	68.3	9.17	2.16	2
FALSE	High	Master Protein	P19109	ATP-dependent RNA helicase p62 OS=Drosophila melanogaster OX=7227 GN=Rm62 PE=1 SV=3	0	5.058	5	3	3	3	1	719	78.5	9.6	0	3
FALSE	High	Master Protein	P38979	40S ribosomal protein SA OS=Drosophila melanogaster OX=7227 GN=sta PE=1 SV=3	0	5.03	4	1	2	1	1	270	30.2	4.87	4.45	1
FALSE	High	Master Protein	Q9VDH8	40S ribosomal protein S30 OS=Drosophila melanogaster OX=7227 GN=RpS30 PE=1 SV=1	0	5.03	8	2	3	2	1	132	14.6	10.05	2.19	2
FALSE	High	Master Protein	Q9Y166	BcDNA.GH02431 OS=Drosophila melanogaster OX=7227 GN=Dic1 PE=1 SV=1	0	4.995	7	2	2	2	1	280	30.7	10.02	1.76	2
FALSE	High	Master Protein	Q9VNB9	GEO07455p1 OS=Drosophila melanogaster OX=7227 GN=RpL35A PE=1 SV=1	0	4.984	6	1	3	1	1	157	17.6	11.12	0	1
FALSE	High	Master Protein	O61722	PRL-1 phosphatase, isoform A OS=Drosophila melanogaster OX=7227 GN=PRL-1 PE=1 SV=2	0	4.885	16	3	3	3	1	176	20	8.63	5.51	3
FALSE	High	Master Protein	Q9VGS2	Translationally-controlled tumor protein homolog OS=Drosophila melanogaster OX=7227 GN=Tctp PE=1 SV=1	0	4.881	16	3	4	3	1	172	19.6	4.81	1.82	3
FALSE	High	Master Protein	A1Z729	Uncharacterized protein OS=Drosophila melanogaster OX=7227 GN=Dmel\CG2064 PE=1 SV=1	0	4.875	10	3	3	3	1	330	36.6	8.66	1.61	3
FALSE	High	Master Protein	Q0E8E8	MIP08013p1 OS=Drosophila melanogaster OX=7227 GN=Mpcp2 PE=1 SV=1	0	4.871	8	3	3	3	1	356	38.8	8.88	0	3
FALSE	High	Master Protein	Q9V3L6	Nuclear cap-binding protein subunit 2 OS=Drosophila melanogaster OX=7227 GN=Cbp20 PE=1 SV=1	0	4.863	17	3	3	3	1	154	17.7	7.78	1.96	3
FALSE	High	Master Protein	Q9VZI1	Transgelin OS=Drosophila melanogaster OX=7227 GN=Chd64 PE=1 SV=2	0	4.845	12	2	2	2	1	188	20.6	8.43	2.17	2
FALSE	High	Master Protein	P13060	Elongation factor 2 OS=Drosophila melanogaster OX=7227 GN=EF2 PE=1 SV=4	0	4.8	5	3	3	3	1	844	94.4	6.6	0	3
FALSE	High	Master Protein	O77410	Eukaryotic translation initiation factor 3 subunit E OS=Drosophila melanogaster OX=7227 GN=eIF3e PE=1 SV=1	0	4.793	4	2	2	2	1	435	51.1	6.79	2.02	2
FALSE	High	Master Protein	A1Z784	Acetyl-CoA carboxylase, isoform A OS=Drosophila melanogaster OX=7227 GN=ACC PE=1 SV=1	0	4.758	1	3	3	3	1	2482	278.4	6.24	0	3
FALSE	High	Master Protein	Q9VPE2	NADH dehydrogenase (Ubiquinone) 39 kDa subunit, isoform A OS=Drosophila melanogaster OX=7227 GN=ND-39 PE=1 SV=1	0	4.7	3	1	1	1	1	416	46.8	9.39	2.45	1
FALSE	High	Master Protein	Q9VD29	RE74312p OS=Drosophila melanogaster OX=7227 GN=Sar1 PE=1 SV=1	0	4.697	12	2	2	2	1	193	21.8	6.93	0	2
FALSE	High	Master Protein	Q9VFB5	IP02321p OS=Drosophila melanogaster OX=7227 GN=Rpb7 PE=1 SV=2	0	4.669	12	2	2	2	1	173	19.1	6.52	0	2
FALSE	High	Master Protein	Q9W0M4	LP10861p OS=Drosophila melanogaster OX=7227 GN=Dmel\CG13887 PE=1 SV=1	0	4.633	9	2	2	2	1	228	26.1	9.32	4.11	2
FALSE	High	Master Protein	A0A0B4KEY4	Patronin, isoform I OS=Drosophila melanogaster OX=7227 GN=Patronin PE=1 SV=1	0	4.616	1	2	2	2	1	1689	189.8	8.51	1.7	2
FALSE	High	Master Protein	A8DZ29	Eukaryotic translation initiation factor 4G1, isoform B OS=Drosophila melanogaster OX=7227 GN=eIF4G1 PE=1 SV=1	0	4.605	2	3	3	3	1	1919	211	8.35	3.53	3
FALSE	High	Master Protein	O18640	Guanine nucleotide-binding protein subunit beta-like protein OS=Drosophila melanogaster OX=7227 GN=Rack1 PE=1 SV=2	0	4.592	7	3	3	3	1	318	35.6	7.47	1.73	3
FALSE	High	Master Protein	Q9VEB3	Ribosome production factor 2 homolog OS=Drosophila melanogaster OX=7227 GN=Non3 PE=2 SV=3	0	4.563	8	3	4	3	1	320	36.5	10.26	1.85	3
FALSE	High	Master Protein	P02255	Histone H1 OS=Drosophila melanogaster OX=7227 GN=His1 PE=1 SV=1	0	4.549	4	2	3	2	1	256	26.3	10.54	1.74	2
FALSE	High	Master Protein	Q9VAJ9	SD09259p OS=Drosophila melanogaster OX=7227 GN=Dmel\CG1907 PE=1 SV=1	0	4.545	9	3	3	3	1	317	34.6	9.79	0	3
FALSE	High	Master Protein	P54367	Casein kinase I isoform alpha OS=Drosophila melanogaster OX=7227 GN=CkIalpha PE=1 SV=1	0	4.537	6	2	2	2	1	337	39.5	9.38	0	2
FALSE	High	Master Protein	Q8SY19	Microsomal glutathione S-transferase-like, isoform A OS=Drosophila melanogaster OX=7227 GN=Mgstl PE=1 SV=1	0	4.469	7	2	2	2	1	152	16.9	9.99	0	2
FALSE	High	Master Protein	P91926	AP-2 complex subunit alpha OS=Drosophila melanogaster OX=7227 GN=AP-2alpha PE=1 SV=1	0	4.455	2	2	2	2	1	940	105.6	7.18	2.21	2
FALSE	High	Master Protein	O18413	26S proteasome regulatory subunit 8 OS=Drosophila melanogaster OX=7227 GN=Rpt6 PE=1 SV=2	0	4.416	8	3	3	3	1	405	45.8	8.41	0	3
FALSE	High	Master Protein	A0A0B4KEE7	Leucine-rich repeat, isoform F OS=Drosophila melanogaster OX=7227 GN=LRR PE=1 SV=1	0	4.403	2	2	2	2	1	1486	161.5	7.77	1.91	2
FALSE	High	Master Protein	Q9VFT4	AT27578p OS=Drosophila melanogaster OX=7227 GN=rin PE=1 SV=1	0	4.356	3	2	2	2	1	690	74.9	7.37	0	2
FALSE	High	Master Protein	Q9VK59	LD23647p OS=Drosophila melanogaster OX=7227 GN=Dmel\CG5787 PE=1 SV=2	0	4.296	3	3	3	3	1	950	100.2	9.74	0	3
FALSE	High	Master Protein	Q9V597	60S ribosomal protein L31 OS=Drosophila melanogaster OX=7227 GN=RpL31 PE=1 SV=1	0	4.282	23	3	4	3	1	124	14.5	10.2	3.4	3
FALSE	High	Master Protein	Q9VSN9	GM04779p OS=Drosophila melanogaster OX=7227 GN=SrpRbeta PE=1 SV=2	0	4.271	9	2	2	2	1	244	27.1	8.97	0	2
FALSE	High	Master Protein	X2J4W8	Kruppel homolog 2, isoform C OS=Drosophila melanogaster OX=7227 GN=Kr-h2 PE=1 SV=1	0	4.23	10	3	3	3	1	276	31.2	9.77	2.14	3
FALSE	High	Master Protein	A1ZA77	FI07302p OS=Drosophila melanogaster OX=7227 GN=Dmel\CG8320 PE=1 SV=1	0	4.217	7	1	1	1	1	174	19.6	9.54	1.61	1
FALSE	High	Master Protein	Q9U9Q1	Replication factor C 38kD subunit, isoform A OS=Drosophila melanogaster OX=7227 GN=RfC38 PE=1 SV=1	0	4.201	7	2	2	2	1	356	40.8	8.4	0	2
FALSE	High	Master Protein	Q86BS3	Chromator, isoform A OS=Drosophila melanogaster OX=7227 GN=Chro PE=1 SV=1	0	4.174	1	1	1	1	1	926	101	7.17	3.53	1
FALSE	High	Master Protein	Q94920	Voltage-dependent anion-selective channel OS=Drosophila melanogaster OX=7227 GN=porin PE=1 SV=3	0	4.147	11	3	3	3	1	282	30.5	6.96	0	3
FALSE	High	Master Protein	Q9W2K2	U6 snRNA-associated Sm-like protein LSm1 OS=Drosophila melanogaster OX=7227 GN=LSm1 PE=1 SV=1	0	4.136	9	1	1	1	1	137	15.7	5.43	1.61	1
FALSE	High	Master Protein	P23226	205 kDa microtubule-associated protein OS=Drosophila melanogaster OX=7227 GN=Map205 PE=1 SV=2	0	4.12	2	2	2	2	1	1185	126.6	4.86	0	2
FALSE	High	Master Protein	M9PGI6	Secretory 22, isoform B OS=Drosophila melanogaster OX=7227 GN=Sec22 PE=1 SV=1	0	4.09	6	1	1	1	1	213	24.8	9.29	1.87	1
FALSE	High	Master Protein	A0A0B4LHL7	ATP synthase subunit d, mitochondrial OS=Drosophila melanogaster OX=7227 GN=ATPsynD PE=3 SV=1	0	4.021	15	2	2	2	1	178	20.2	6.55	0	2
FALSE	High	Master Protein	Q9VLV5	Probable small nuclear ribonucleoprotein E OS=Drosophila melanogaster OX=7227 GN=SmE PE=1 SV=1	0	4.019	12	1	1	1	1	94	11.1	9.63	1.97	1
FALSE	High	Master Protein	Q9VF83	LD33178p OS=Drosophila melanogaster OX=7227 GN=CG12258 PE=1 SV=2	0	4	3	1	2	1	1	439	50	8.82	0	1
FALSE	High	Master Protein	P13469	DNA-binding protein modulo OS=Drosophila melanogaster OX=7227 GN=mod PE=1 SV=2	0	3.969	2	1	1	1	1	542	60.3	5.43	1.91	1
FALSE	High	Master Protein	Q9Y0Y5	Coatomer subunit epsilon OS=Drosophila melanogaster OX=7227 GN=epsilonCOP PE=1 SV=1	0	3.965	7	2	2	2	1	306	34.6	4.87	0	2
FALSE	High	Master Protein	Q9VDW7	Succinate--CoA ligase [ADP/GDP-forming] subunit alpha, mitochondrial OS=Drosophila melanogaster OX=7227 GN=Scsalpha2 PE=2 SV=1	0	3.89	4	1	1	1	1	342	35.8	9.36	1.84	1
FALSE	High	Master Protein	M9PH59	Ribosomal protein L37 OS=Drosophila melanogaster OX=7227 GN=RpL37a PE=2 SV=1	0	3.881	13	1	1	1	1	93	10.6	11.69	0	1
FALSE	High	Master Protein	P08646	Ras-like protein 1 OS=Drosophila melanogaster OX=7227 GN=Ras85D PE=1 SV=2	0	3.876	11	2	3	2	1	189	21.6	7.81	2.24	2
FALSE	High	Master Protein	P52304	Serine/threonine-protein kinase polo OS=Drosophila melanogaster OX=7227 GN=polo PE=1 SV=2	0	3.873	3	2	2	2	1	576	66.9	8.88	1.65	2
FALSE	High	Master Protein	X2JAI2	Arp2/3 complex 34 kDa subunit OS=Drosophila melanogaster OX=7227 GN=Arpc2 PE=3 SV=1	0	3.864	7	2	2	2	1	301	35.1	7.91	2.15	2
FALSE	High	Master Protein	P41092	60S ribosomal protein L27a OS=Drosophila melanogaster OX=7227 GN=RpL27A PE=1 SV=2	0	3.835	13	2	3	2	1	149	17	10.71	3.86	2
FALSE	High	Master Protein	Q94516	ATP synthase subunit b, mitochondrial OS=Drosophila melanogaster OX=7227 GN=ATPsynB PE=2 SV=2	0	3.791	5	1	1	1	1	243	27.3	8.72	1.63	1
FALSE	High	Master Protein	Q8IPX7	RE44908p OS=Drosophila melanogaster OX=7227 GN=Rrp40 PE=1 SV=1	0	3.717	8	2	2	2	1	232	25	8.31	2.85	2
FALSE	High	Master Protein	M9PGZ8	Smrter, isoform G OS=Drosophila melanogaster OX=7227 GN=Smr PE=1 SV=1	0	3.696	1	2	2	2	1	3607	379.6	9.44	1.86	2
FALSE	High	Master Protein	Q8SXY6	Transmembrane emp24 domain-containing protein bai OS=Drosophila melanogaster OX=7227 GN=bai PE=2 SV=1	0	3.613	5	1	1	1	1	206	23.7	8.22	0	1
FALSE	High	Master Protein	Q9VHS8	Eukaryotic initiation factor 4A-III OS=Drosophila melanogaster OX=7227 GN=CG7483 PE=1 SV=1	0	3.532	6	2	2	1	1	399	45.6	6.02	1.61	2
FALSE	High	Master Protein	Q9VJ11	Calcium load-activated calcium channel OS=Drosophila melanogaster OX=7227 GN=anon-37B-2 PE=1 SV=1	0	3.516	8	1	1	1	1	183	20.8	9.5	2.12	1
FALSE	High	Master Protein	M9PIM0	Ribosomal protein L10, isoform E OS=Drosophila melanogaster OX=7227 GN=RpL10 PE=4 SV=1	0	3.476	8	2	2	2	1	218	25.5	9.85	0	2
FALSE	High	Master Protein	Q9V3R8	UbiA prenyltransferase domain-containing protein 1 homolog OS=Drosophila melanogaster OX=7227 GN=heix PE=2 SV=1	0	3.463	4	1	1	1	1	359	39.2	8.51	1.94	1
FALSE	High	Master Protein	M9MRG2	Nucleosome-destabilizing factor, isoform B OS=Drosophila melanogaster OX=7227 GN=Ndf PE=4 SV=1	0	3.448	3	2	2	2	1	603	65.3	5.97	0	2
FALSE	High	Master Protein	Q9VEN6	Mitochondrial ribosomal protein S11 OS=Drosophila melanogaster OX=7227 GN=mRpS11 PE=1 SV=1	0	3.442	6	1	1	1	1	200	21.8	10.52	0	1
FALSE	High	Master Protein	Q9VSR5	GM03767p OS=Drosophila melanogaster OX=7227 GN=mRpL12 PE=1 SV=1	0	3.427	14	2	2	2	1	182	19.6	8.75	1.64	2
FALSE	High	Master Protein	M9PD43	Uncharacterized protein, isoform B OS=Drosophila melanogaster OX=7227 GN=BG:DS00941.3 PE=4 SV=1	0	3.399	7	2	3	2	1	247	27.7	8.95	2	2
FALSE	High	Master Protein	Q9VPX5	Vacuolar protein sorting-associated protein 29 OS=Drosophila melanogaster OX=7227 GN=Vps29 PE=1 SV=1	0	3.396	7	1	1	1	1	182	20.5	7.01	2.11	1
FALSE	High	Master Protein	Q4QQ70	IP09819p OS=Drosophila melanogaster OX=7227 GN=Dmel\CG15602 PE=1 SV=1	0	3.393	5	2	2	2	1	342	38.6	5.11	0	2
FALSE	High	Master Protein	P48148	Ras-like GTP-binding protein Rho1 OS=Drosophila melanogaster OX=7227 GN=Rho1 PE=1 SV=1	0	3.389	6	1	1	1	1	192	21.7	7.01	1.96	1
FALSE	High	Master Protein	Q9VNI8	Hpr1 OS=Drosophila melanogaster OX=7227 GN=Hpr1 PE=1 SV=1	0	3.378	1	1	1	1	1	701	80.7	5.05	0	1
FALSE	High	Master Protein	Q9VKW3	Replication factor C subunit 3 OS=Drosophila melanogaster OX=7227 GN=RfC3 PE=1 SV=2	0	3.357	3	1	1	1	1	332	37.4	7.2	1.7	1
FALSE	High	Master Protein	O76902	Pleckstrin homology domain-containing family F member 1 homolog OS=Drosophila melanogaster OX=7227 GN=rush PE=1 SV=1	0	3.308	3	1	1	1	1	316	34.2	7.78	1.91	1
FALSE	High	Master Protein	Q8T4C4	ATP synthase subunit beta OS=Drosophila melanogaster OX=7227 GN=ATPsynbetaL PE=2 SV=1	0	3.28	2	1	1	1	1	622	67.7	5.12	1.69	1
FALSE	High	Master Protein	Q9W2U7	LP18708p OS=Drosophila melanogaster OX=7227 GN=nocte PE=1 SV=4	0	3.267	1	1	1	1	1	2309	235.4	9.22	2.04	1
FALSE	High	Master Protein	A0A0C4DHE8	GEO09636p1 OS=Drosophila melanogaster OX=7227 GN=RpS29 PE=1 SV=1	0	3.264	30	2	5	2	1	56	6.6	9.61	7.72	2
FALSE	High	Master Protein	P54622	Single-stranded DNA-binding protein, mitochondrial OS=Drosophila melanogaster OX=7227 GN=mtSSB PE=1 SV=2	0	3.262	12	2	2	2	1	146	16.4	9.85	1.61	2
FALSE	High	Master Protein	Q8INK3	Fatty acid binding protein, isoform C OS=Drosophila melanogaster OX=7227 GN=fabp PE=1 SV=1	0	3.262	11	2	2	2	1	157	17.1	6.01	1.61	2
FALSE	High	Master Protein	Q8IRD3	Glutathione peroxidase OS=Drosophila melanogaster OX=7227 GN=PHGPx PE=1 SV=1	0	3.214	8	2	2	2	1	238	26.2	8.76	1.69	2
FALSE	High	Master Protein	Q9VN25	Eukaryotic translation initiation factor 3 subunit A OS=Drosophila melanogaster OX=7227 GN=eIF3a PE=1 SV=1	0	3.211	1	2	2	2	1	1140	133.8	9.01	0	2
FALSE	High	Master Protein	P41073	Zinc finger protein on ecdysone puffs OS=Drosophila melanogaster OX=7227 GN=Pep PE=1 SV=1	0	3.173	2	1	1	1	1	716	78	5.58	1.8	1
FALSE	High	Master Protein	Q9V9S8	Ferrochelatase, mitochondrial OS=Drosophila melanogaster OX=7227 GN=FeCh PE=2 SV=1	0	3.171	4	2	2	2	1	384	43.6	8.4	0	2
FALSE	High	Master Protein	P41375	Eukaryotic translation initiation factor 2 subunit 2 OS=Drosophila melanogaster OX=7227 GN=eIF2beta PE=1 SV=1	0	3.153	6	2	2	2	1	312	35.2	5.77	2.13	2
FALSE	High	Master Protein	Q9VQ29	Cytochrome b-c1 complex subunit Rieske, mitochondrial OS=Drosophila melanogaster OX=7227 GN=RFeSP PE=1 SV=3	0	3.152	4	1	2	1	1	230	24.9	8.68	2.53	1
FALSE	High	Master Protein	P41374	Eukaryotic translation initiation factor 2 subunit 1 OS=Drosophila melanogaster OX=7227 GN=eIF2alpha PE=2 SV=1	0	3.126	4	1	1	1	1	341	38.6	4.94	0	1
FALSE	High	Master Protein	M9PCD6	Proteome of centrioles 1, isoform B OS=Drosophila melanogaster OX=7227 GN=Poc1 PE=4 SV=1	0	3.103	6	2	2	2	1	403	44	7.12	1.8	2
FALSE	High	Master Protein	M9PCI2	GEO11453p1 OS=Drosophila melanogaster OX=7227 GN=NHP2 PE=2 SV=1	0	3.048	11	2	3	2	1	160	17.7	8.1	0	2
FALSE	High	Master Protein	Q9W4X7	Eukaryotic translation initiation factor 3 subunit G-1 OS=Drosophila melanogaster OX=7227 GN=eIF3g1 PE=1 SV=1	0	3.036	9	2	2	2	1	269	29.9	8.79	1.71	2
FALSE	High	Master Protein	M9PGG4	Armadillo, isoform F OS=Drosophila melanogaster OX=7227 GN=arm PE=4 SV=1	0	3.015	1	1	1	1	1	843	91.1	5.58	1.94	1
FALSE	High	Master Protein	Q9VCK0	Eukaryotic translation initiation factor 3 subunit D-1 OS=Drosophila melanogaster OX=7227 GN=eIF3d1 PE=1 SV=1	0	3.004	4	2	2	2	1	560	63.8	7.02	2.27	2
FALSE	High	Master Protein	Q7JZ53	RE57564p OS=Drosophila melanogaster OX=7227 GN=mRpS4 PE=1 SV=1	0	2.997	7	1	1	1	1	181	21.3	9.64	0	1
FALSE	High	Master Protein	Q7JVI3	Eukaryotic translation initiation factor 3 subunit M OS=Drosophila melanogaster OX=7227 GN=eIF3m PE=2 SV=1	0	2.988	2	1	1	1	1	387	44.1	5.71	0	1
FALSE	High	Master Protein	Q9W3N1	RH59310p OS=Drosophila melanogaster OX=7227 GN=spidey PE=1 SV=1	0	2.976	4	2	2	2	1	321	35.1	9.47	0	2
FALSE	High	Master Protein	Q9VJ59	PRA1 family protein OS=Drosophila melanogaster OX=7227 GN=Jwa PE=1 SV=5	0	2.971	4	1	1	1	1	249	27.8	9.99	1.75	1
FALSE	High	Master Protein	O77086	Guanine nucleotide-releasing factor 2 OS=Drosophila melanogaster OX=7227 GN=C3G PE=1 SV=4	0	2.967	1	1	1	1	1	1571	172	7.09	1.99	1
FALSE	High	Master Protein	Q9VPK3	AT24407p OS=Drosophila melanogaster OX=7227 GN=Dmel\CG31974 PE=2 SV=3	0	2.961	2	1	2	1	1	413	47.4	5.76	4.23	1
FALSE	High	Master Protein	Q9V7D2	V-type proton ATPase subunit D 1 OS=Drosophila melanogaster OX=7227 GN=Vha36-1 PE=2 SV=1	0	2.953	9	2	2	2	1	246	27.6	9.54	0	2
FALSE	High	Master Protein	Q9VLR5	RNA polymerase II transcriptional coactivator OS=Drosophila melanogaster OX=7227 GN=Ssb-c31a PE=2 SV=1	0	2.914	9	1	1	1	1	110	12.2	9.17	0	1
FALSE	High	Master Protein	B7Z0G3	Uncharacterized protein, isoform B OS=Drosophila melanogaster OX=7227 GN=TIM14 PE=4 SV=1	0	2.869	11	1	1	1	1	128	14	9.96	2.47	1
FALSE	High	Master Protein	Q9VZC8	GEO12024p1 OS=Drosophila melanogaster OX=7227 GN=Dmel\CG15019 PE=1 SV=1	0	2.867	12	1	1	1	1	146	17.3	9.94	0	1
FALSE	High	Master Protein	Q86BR8	Mitochondrial transcription factor A, isoform B OS=Drosophila melanogaster OX=7227 GN=TFAM PE=1 SV=1	0	2.78	7	2	2	2	1	284	33	9.96	0	2
FALSE	High	Master Protein	Q9VP57	LD15904p OS=Drosophila melanogaster OX=7227 GN=pzg PE=1 SV=1	0	2.777	1	1	1	1	1	996	105	4.89	1.9	1
FALSE	High	Master Protein	X2JEM4	GEO07185p1 OS=Drosophila melanogaster OX=7227 GN=RpS28b PE=2 SV=1	0	2.763	17	1	1	1	1	65	7.5	10.37	1.83	1
FALSE	High	Master Protein	P49028	Protein mago nashi OS=Drosophila melanogaster OX=7227 GN=mago PE=1 SV=1	0	2.755	6	1	1	1	1	147	17.3	6.11	1.87	1
FALSE	High	Master Protein	Q9V3C0	ATP-dependent RNA helicase abstrakt OS=Drosophila melanogaster OX=7227 GN=abs PE=1 SV=1	0	2.754	2	1	1	1	1	619	69.4	6.8	1.61	1
FALSE	High	Master Protein	Q9VAX8	LD28793p OS=Drosophila melanogaster OX=7227 GN=Dmel\CG4849 PE=1 SV=1	0	2.731	2	2	2	2	1	975	110.6	5.03	0	2
FALSE	High	Master Protein	Q9VVW3	Sideroflexin-2 OS=Drosophila melanogaster OX=7227 GN=Sfxn2 PE=2 SV=2	0	2.706	3	1	1	1	1	327	36.5	9.11	0	1
FALSE	High	Master Protein	Q9W402	NADH dehydrogenase (Ubiquinone) B16.6 subunit, isoform A OS=Drosophila melanogaster OX=7227 GN=ND-B16.6 PE=1 SV=1	0	2.674	9	1	1	1	1	154	17.7	9.39	2.05	1
FALSE	High	Master Protein	Q9VN44	FI07923p OS=Drosophila melanogaster OX=7227 GN=Karybeta3 PE=1 SV=1	0	2.646	1	1	1	1	1	1105	123.5	4.73	0	1
FALSE	High	Master Protein	Q8INM3	Protein slender lobes OS=Drosophila melanogaster OX=7227 GN=sle PE=1 SV=1	0	2.642	1	1	1	1	1	1420	158.6	5.24	1.62	1
FALSE	High	Master Protein	Q9W1N3	Levy, isoform A OS=Drosophila melanogaster OX=7227 GN=levy PE=1 SV=1	0	2.641	16	1	1	1	1	109	12.5	9.7	0	1
FALSE	High	Master Protein	M9PBW0	Ubiquitin conjugating enzyme E2M, isoform B OS=Drosophila melanogaster OX=7227 GN=UbcE2M PE=3 SV=1	0	2.611	6	1	1	1	1	181	20.7	7.15	0	1
FALSE	High	Master Protein	Q9VKC1	IP16805p OS=Drosophila melanogaster OX=7227 GN=RpL7-like PE=1 SV=2	0	2.606	4	1	1	1	1	257	29.1	10.1	0	1
FALSE	High	Master Protein	Q08473	RNA-binding protein squid OS=Drosophila melanogaster OX=7227 GN=sqd PE=1 SV=3	0	2.599	3	1	1	1	1	344	36.2	7.46	0	1
FALSE	High	Master Protein	A1Z6Q0	Klaroid, isoform D OS=Drosophila melanogaster OX=7227 GN=koi PE=1 SV=1	0.002	2.568	2	1	1	1	1	449	51.7	9.1	1.79	1
FALSE	High	Master Protein	P48809	Heterogeneous nuclear ribonucleoprotein 27C OS=Drosophila melanogaster OX=7227 GN=Hrb27C PE=1 SV=2	0.002	2.515	5	1	1	1	1	421	44.7	6.8	0	1
FALSE	High	Master Protein	Q95029	Cathepsin L OS=Drosophila melanogaster OX=7227 GN=Cp1 PE=2 SV=2	0.002	2.502	3	1	1	1	1	371	41.6	7.21	1.67	1
FALSE	High	Master Protein	Q27268	ATP-dependent RNA helicase WM6 OS=Drosophila melanogaster OX=7227 GN=Hel25E PE=1 SV=1	0.002	2.483	4	2	2	2	1	424	48.6	5.66	0	2
FALSE	High	Master Protein	Q9VW53	FI01414p OS=Drosophila melanogaster OX=7227 GN=Mtr3 PE=1 SV=1	0.002	2.469	5	2	2	2	1	326	36.6	5.21	0	2
FALSE	High	Master Protein	Q94523	Succinate dehydrogenase [ubiquinone] flavoprotein subunit, mitochondrial OS=Drosophila melanogaster OX=7227 GN=SdhA PE=2 SV=3	0.002	2.468	2	1	1	1	1	661	72.3	7.12	0	1
FALSE	High	Master Protein	Q9VI57	Dephospho-CoA kinase OS=Drosophila melanogaster OX=7227 GN=Dpck PE=2 SV=1	0.002	2.455	9	2	2	2	1	236	27.1	7.8	0	2
FALSE	High	Master Protein	Q8MSW0	Isoleucyl-tRNA synthetase, isoform A OS=Drosophila melanogaster OX=7227 GN=IleRS PE=1 SV=1	0.002	2.433	1	2	2	2	1	1229	141	7.52	0	2
FALSE	High	Master Protein	Q9VAW3	GH12731p OS=Drosophila melanogaster OX=7227 GN=Gfat2 PE=1 SV=1	0.002	2.433	1	1	1	1	1	683	76.5	6.62	1.79	1
FALSE	High	Master Protein	Q9U5L1	Signal recognition particle receptor subunit alpha homolog OS=Drosophila melanogaster OX=7227 GN=Gtp-bp PE=1 SV=2	0.002	2.408	2	1	1	1	1	614	67.8	6.83	0	1
FALSE	High	Master Protein	O76767	ER lumen protein-retaining receptor OS=Drosophila melanogaster OX=7227 GN=KdelR PE=2 SV=1	0.002	2.383	5	1	1	1	1	212	24.5	8.72	2	1
FALSE	High	Master Protein	Q95U38	Succinate--CoA ligase [ADP-forming] subunit beta, mitochondrial OS=Drosophila melanogaster OX=7227 GN=ScsbetaA PE=1 SV=1	0.002	2.37	4	2	2	2	1	503	54.9	8.62	1.63	2
FALSE	High	Master Protein	A0A0B4KI24	Nucleoplasmin, isoform B OS=Drosophila melanogaster OX=7227 GN=Nlp PE=4 SV=1	0.002	2.369	7	1	1	1	1	152	17	4.61	1.86	1
FALSE	High	Master Protein	Q7KSQ0	LD46175p OS=Drosophila melanogaster OX=7227 GN=sea PE=1 SV=1	0.002	2.289	6	2	2	2	1	317	34.1	9.42	3.56	2
FALSE	High	Master Protein	Q9VEX9	Histone deacetylase complex subunit SAP18 OS=Drosophila melanogaster OX=7227 GN=Bin1 PE=1 SV=1	0.002	2.183	7	1	1	1	1	150	17.3	8.29	0	1
FALSE	High	Master Protein	A1Z7K8	AaRS-interacting multifunctional protein 1 OS=Drosophila melanogaster OX=7227 GN=AIMP1 PE=1 SV=1	0.002	2.161	3	1	1	1	1	323	34.4	8.91	0	1
FALSE	High	Master Protein	P48810	Heterogeneous nuclear ribonucleoprotein 87F OS=Drosophila melanogaster OX=7227 GN=Hrb87F PE=2 SV=2	0.002	2.159	3	1	1	1	1	385	39.5	9.03	0	1
FALSE	High	Master Protein	Q9V3W2	GM23292p OS=Drosophila melanogaster OX=7227 GN=ND-B17 PE=1 SV=1	0.002	2.129	5	1	1	1	1	167	19	9.82	0	1
FALSE	High	Master Protein	Q9Y171	BcDNA.GH02220 OS=Drosophila melanogaster OX=7227 GN=OXA1L PE=2 SV=1	0.002	2.129	2	1	1	1	1	441	48.7	9.55	0	1
FALSE	High	Master Protein	Q9VUL8	LD41491p OS=Drosophila melanogaster OX=7227 GN=Pex3 PE=1 SV=1	0.002	2.129	6	2	2	2	1	385	43.7	8.5	0	2
FALSE	High	Master Protein	Q9VUC3	GH21710p OS=Drosophila melanogaster OX=7227 GN=Dmel\CG6833 PE=1 SV=1	0.002	2.117	3	1	1	1	1	290	32.3	10.11	0	1
FALSE	High	Master Protein	Q9V3D2	Oxygen-dependent coproporphyrinogen-III oxidase OS=Drosophila melanogaster OX=7227 GN=Coprox PE=2 SV=1	0.002	2.114	3	1	1	1	1	390	44.4	8.72	0	1
FALSE	High	Master Protein	A1ZBE9	Methionyl-tRNA synthetase OS=Drosophila melanogaster OX=7227 GN=MetRS PE=1 SV=1	0.002	2.109	1	1	1	1	1	1022	112.4	8.51	0	1
FALSE	High	Master Protein	M9NFF8	Cdc42, isoform C OS=Drosophila melanogaster OX=7227 GN=Cdc42 PE=4 SV=1	0.002	2.092	6	1	1	1	1	191	21.4	7.14	0	1
FALSE	High	Master Protein	P92204	Negative elongation factor E OS=Drosophila melanogaster OX=7227 GN=Nelf-E PE=1 SV=1	0.002	2.089	4	1	1	1	1	280	31.8	9.47	0	1
FALSE	High	Master Protein	A4V2K7	D1 chromosomal protein, isoform C OS=Drosophila melanogaster OX=7227 GN=D1 PE=1 SV=1	0.002	2.081	5	1	1	1	1	355	37	6.64	0	1
FALSE	High	Master Protein	P25867	Ubiquitin-conjugating enzyme E2-17 kDa OS=Drosophila melanogaster OX=7227 GN=eff PE=2 SV=1	0.002	2.08	7	1	1	1	1	147	16.7	7.3	0	1
FALSE	High	Master Protein	Q9VXN4	Probable arginine--tRNA ligase, cytoplasmic OS=Drosophila melanogaster OX=7227 GN=ArgRS PE=2 SV=1	0.002	2.079	1	1	1	1	1	665	75.5	7.44	0	1
FALSE	High	Master Protein	Q8T4G5	SD01613p OS=Drosophila melanogaster OX=7227 GN=AFG3L2 PE=1 SV=1	0.002	2.067	1	1	1	1	1	826	89.6	8.95	0	1
FALSE	High	Master Protein	Q9VZY0	LD45195p OS=Drosophila melanogaster OX=7227 GN=Non2 PE=1 SV=1	0.002	2.058	3	1	1	1	1	244	27.5	6.32	0	1
FALSE	High	Master Protein	Q9V9K7	Serrate RNA effector molecule homolog OS=Drosophila melanogaster OX=7227 GN=Ars2 PE=1 SV=2	0.002	2.056	1	1	1	1	1	943	107.2	5.55	0	1
FALSE	High	Master Protein	Q9W394	RRM domain-containing protein OS=Drosophila melanogaster OX=7227 GN=Dmel\CG32708 PE=1 SV=1	0.002	2.024	5	1	1	1	1	239	27.5	9.77	0	1
FALSE	High	Master Protein	Q9VXE0	Probable small nuclear ribonucleoprotein G OS=Drosophila melanogaster OX=7227 GN=SNRPG PE=1 SV=1	0.002	2.016	12	1	1	1	1	76	8.5	8.79	1.7	1
FALSE	High	Master Protein	Q9VL69	LD05267p OS=Drosophila melanogaster OX=7227 GN=CK01296 PE=1 SV=1	0.002	2.005	6	1	1	1	1	190	21.6	9.57	0	1
FALSE	High	Master Protein	Q9VRL0	Cytochrome c1, isoform A OS=Drosophila melanogaster OX=7227 GN=Cyt-c1 PE=1 SV=1	0.002	1.994	4	1	1	1	1	307	33.7	8.53	0	1
FALSE	High	Master Protein	Q9VFP0	RH07106p OS=Drosophila melanogaster OX=7227 GN=Dmel\CG3061 PE=1 SV=1	0.002	1.977	4	1	1	1	1	370	41.7	9.03	0	1
FALSE	High	Master Protein	Q9VEQ1	LD10670p OS=Drosophila melanogaster OX=7227 GN=Dmel\CG17556 PE=2 SV=1	0.002	1.971	3	1	1	1	1	282	32.7	7.05	1.73	1
FALSE	High	Master Protein	Q9VSS2	Signal recognition particle subunit SRP68 OS=Drosophila melanogaster OX=7227 GN=Srp68 PE=2 SV=1	0.002	1.968	2	1	1	1	1	604	69	8.47	0	1
FALSE	High	Master Protein	P48598	Eukaryotic translation initiation factor 4E1 OS=Drosophila melanogaster OX=7227 GN=eIF4E1 PE=1 SV=1	0.002	1.967	4	1	1	1	1	259	29.2	6.24	0	1
FALSE	High	Master Protein	Q9VLJ9	39S ribosomal protein L51, mitochondrial OS=Drosophila melanogaster OX=7227 GN=mRpL51 PE=2 SV=2	0.002	1.964	7	1	1	1	1	174	20.2	10.54	0	1
FALSE	High	Master Protein	A1Z6P3	Eb1, isoform F OS=Drosophila melanogaster OX=7227 GN=Eb1 PE=1 SV=2	0.002	1.959	3	1	1	1	1	297	33.3	5.72	0	1
FALSE	High	Master Protein	M9PF20	Trailer hitch, isoform H OS=Drosophila melanogaster OX=7227 GN=tral PE=1 SV=1	0.002	1.946	2	1	1	1	1	657	69.8	9.48	0	1
FALSE	High	Master Protein	Q8IRJ8	THO complex protein 7 OS=Drosophila melanogaster OX=7227 GN=thoc7 PE=1 SV=2	0.004	1.898	3	1	1	1	1	288	33	4.84	0	1
FALSE	High	Master Protein	Q7K3V6	AT01345p OS=Drosophila melanogaster OX=7227 GN=mEFTu2 PE=1 SV=1	0.004	1.897	2	1	2	1	1	456	49.6	7.69	1.72	1
FALSE	High	Master Protein	P25160	ADP-ribosylation factor-like protein 1 OS=Drosophila melanogaster OX=7227 GN=Arl1 PE=2 SV=5	0.004	1.893	6	1	1	1	1	180	20.2	6.57	0	1
FALSE	High	Master Protein	P05205	Heterochromatin protein 1 OS=Drosophila melanogaster OX=7227 GN=Su(var)205 PE=1 SV=2	0.004	1.867	4	1	1	1	1	206	23.2	5.08	0	1
FALSE	High	Master Protein	Q0E8X7	Reduction of Rh1, isoform A OS=Drosophila melanogaster OX=7227 GN=roh PE=1 SV=1	0.004	1.849	10	1	1	1	1	82	9.5	9.67	0	1
FALSE	High	Master Protein	O77430	GEO01111p1 OS=Drosophila melanogaster OX=7227 GN=SkpA PE=1 SV=1	0.004	1.847	5	1	1	1	1	162	18.6	4.65	0	1
FALSE	High	Master Protein	Q8WTC1	28S ribosomal protein S15, mitochondrial OS=Drosophila melanogaster OX=7227 GN=bonsai PE=2 SV=2	0.004	1.844	4	1	1	1	1	280	33.5	9.2	0	1
FALSE	High	Master Protein	Q9VU02	Probable small nuclear ribonucleoprotein Sm D1 OS=Drosophila melanogaster OX=7227 GN=SmD1 PE=1 SV=1	0.004	1.827	9	1	1	1	1	124	13.8	11.65	0	1
FALSE	High	Master Protein	O62619	Pyruvate kinase OS=Drosophila melanogaster OX=7227 GN=PyK PE=2 SV=2	0.004	1.814	2	1	1	1	1	533	57.4	7.44	0	1
FALSE	High	Master Protein	B5RJQ0	L-lactate dehydrogenase OS=Drosophila melanogaster OX=7227 GN=Ldh PE=1 SV=1	0.004	1.807	3	1	1	1	1	332	35.5	7.08	0	1
FALSE	High	Master Protein	Q9V492	Mpv17-like protein OS=Drosophila melanogaster OX=7227 GN=CG11077 PE=2 SV=1	0.004	1.795	5	1	1	1	1	168	19.5	9.83	0	1
FALSE	High	Master Protein	P35381	ATP synthase subunit alpha, mitochondrial OS=Drosophila melanogaster OX=7227 GN=blw PE=1 SV=2	0.004	1.784	2	1	1	1	1	552	59.4	9.01	0	1
FALSE	High	Master Protein	Q9VHG5	Insulator binding factor 1, isoform A OS=Drosophila melanogaster OX=7227 GN=Ibf1 PE=1 SV=1	0.004	1.769	4	1	1	1	1	242	27.7	6.44	0	1
FALSE	High	Master Protein	Q9VM11	HL01515p OS=Drosophila melanogaster OX=7227 GN=Dmel\CG5973 PE=2 SV=2	0.004	1.768	3	1	1	1	1	311	36.1	8.48	0	1
FALSE	High	Master Protein	Q9VMH2	Actin-related protein 2/3 complex subunit 4 OS=Drosophila melanogaster OX=7227 GN=Arpc4 PE=1 SV=1	0.004	1.744	7	1	1	1	1	168	19.6	8.46	1.81	1
FALSE	High	Master Protein	Q8IQI3	Uncharacterized protein, isoform B OS=Drosophila melanogaster OX=7227 GN=Dmel\CG10984 PE=1 SV=2	0.004	1.734	2	1	1	1	1	658	73.2	7.02	1.77	1
FALSE	High	Master Protein	P13607	Sodium/potassium-transporting ATPase subunit alpha OS=Drosophila melanogaster OX=7227 GN=Atpalpha PE=1 SV=3	0.004	1.724	1	1	1	1	1	1041	115.5	5.69	0	1
FALSE	High	Master Protein	Q9V470	Succinate--CoA ligase [GDP-forming] subunit beta, mitochondrial OS=Drosophila melanogaster OX=7227 GN=ScsbetaG PE=1 SV=1	0.004	1.713	2	1	1	1	1	416	45	6.01	0	1
FALSE	High	Master Protein	Q9VN50	Eukaryotic translation initiation factor 3 subunit F-1 OS=Drosophila melanogaster OX=7227 GN=eIF3f1 PE=2 SV=1	0.004	1.696	3	1	1	1	1	280	31.1	6.52	0	1
FALSE	High	Master Protein	Q9VGF7	Glutamate carrier 1, isoform A OS=Drosophila melanogaster OX=7227 GN=GC1 PE=1 SV=1	0.004	1.673	4	1	1	1	1	321	34.5	9.55	0	1
FALSE	High	Master Protein	P22700	Calcium-transporting ATPase sarcoplasmic/endoplasmic reticulum type OS=Drosophila melanogaster OX=7227 GN=SERCA PE=1 SV=2	0.004	1.659	1	1	1	1	1	1020	111.6	5.41	0	1
FALSE	High	Master Protein	O76863	EG:100G10.3 protein OS=Drosophila melanogaster OX=7227 GN=eIF2Bbeta PE=1 SV=1	0.004	1.659	3	1	1	1	1	352	39.1	6.27	0	1
FALSE	High	Master Protein	Q9VHT5	LD31571p OS=Drosophila melanogaster OX=7227 GN=mRpL1 PE=1 SV=2	0.004	1.656	3	1	1	1	1	354	40.3	9.42	0	1
FALSE	High	Master Protein	Q9VG73	Interleukin enhancer-binding factor 2 homolog OS=Drosophila melanogaster OX=7227 GN=CG5641 PE=2 SV=1	0.004	1.652	3	1	1	1	1	396	43.6	6.93	0	1
FALSE	High	Master Protein	Q9VHB6	Metaxin-1 homolog OS=Drosophila melanogaster OX=7227 GN=CG9393 PE=1 SV=1	0.004	1.652	3	1	1	1	1	327	37.2	7.44	0	1
FALSE	High	Master Protein	O96692	RE63021p OS=Drosophila melanogaster OX=7227 GN=Rap2l PE=1 SV=1	0.004	1.648	6	1	1	1	1	182	20.4	5.39	0	1
FALSE	High	Master Protein	A0A0B4KFC5	Lingerer, isoform K OS=Drosophila melanogaster OX=7227 GN=lig PE=1 SV=1	0.004	1.63	1	1	1	1	1	1417	144.3	7.21	0	1
FALSE	High	Master Protein	Q9VLT7	IP17351p OS=Drosophila melanogaster OX=7227 GN=RpL36A PE=1 SV=2	0.004	1.629	8	1	1	1	1	104	12.5	10.8	0	1
FALSE	High	Master Protein	A0A023GQA5	Lethal (2) 37Cc, isoform D OS=Drosophila melanogaster OX=7227 GN=l(2)37Cc PE=1 SV=1	0.004	1.62	3	1	1	1	1	276	30.4	5.73	1.81	1
FALSE	High	Master Protein	Q9Y125	BcDNA.GH08312 OS=Drosophila melanogaster OX=7227 GN=Sap-r PE=1 SV=1	0.004	1.605	1	1	2	1	1	953	105.9	4.97	1.78	1
FALSE	High	Master Protein	A0A0B4LHX6	Nucleoside diphosphate kinase OS=Drosophila melanogaster OX=7227 GN=awd PE=1 SV=1	0.004	1.593	5	1	1	1	1	168	18.7	8.12	0	1
FALSE	High	Master Protein	Q9VMZ9	RE36666p OS=Drosophila melanogaster OX=7227 GN=Dmel\CG1092 PE=1 SV=5	0.004	1.578	2	1	1	1	1	394	46.8	7.28	0	1
FALSE	High	Master Protein	Q9I7K0	Microtubule-associated protein Jupiter OS=Drosophila melanogaster OX=7227 GN=Jupiter PE=1 SV=2	0.004	1.576	4	1	1	1	1	208	22.3	10.14	0	1
FALSE	High	Master Protein	Q8T0U6	Serine/threonine-protein phosphatase OS=Drosophila melanogaster OX=7227 GN=flw PE=1 SV=1	0.004	1.566	2	1	1	1	1	461	51.3	6.32	0	1
FALSE	High	Master Protein	Q9W3N9	LD24105p OS=Drosophila melanogaster OX=7227 GN=154229_at PE=1 SV=1	0.004	1.562	2	1	1	1	1	410	43.4	8.68	0	1
FALSE	High	Master Protein	Q9W3J4	LD35215p OS=Drosophila melanogaster OX=7227 GN=Dmel\CG2129 PE=2 SV=1	0.004	1.551	2	1	1	1	1	465	53.3	7.39	0	1
FALSE	High	Master Protein	O76324	Discs overgrown protein kinase OS=Drosophila melanogaster OX=7227 GN=dco PE=1 SV=2	0.004	1.529	2	1	1	1	1	440	47.9	9.5	0	1
FALSE	High	Master Protein	Q24368	Chromatin-remodeling complex ATPase chain Iswi OS=Drosophila melanogaster OX=7227 GN=Iswi PE=1 SV=1	0.004	1.524	1	1	1	1	1	1027	118.8	8.29	0	1
FALSE	High	Master Protein	Q9VS62	Smallminded, isoform A OS=Drosophila melanogaster OX=7227 GN=smid PE=1 SV=1	0.004	1.521	1	1	1	1	1	944	104.3	5.44	0	1
FALSE	High	Master Protein	A0A0B4LEY9	Nucleolar GTP-binding protein 1 OS=Drosophila melanogaster OX=7227 GN=Non1 PE=1 SV=1	0.004	1.517	2	1	1	1	1	652	75.3	9.54	0	1
FALSE	High	Master Protein	Q8SX89	Kugelkern, isoform A OS=Drosophila melanogaster OX=7227 GN=kuk PE=1 SV=1	0.004	1.516	2	1	1	1	1	570	60.1	5.48	0	1
FALSE	High	Master Protein	Q9VJZ4	AT12494p OS=Drosophila melanogaster OX=7227 GN=ND-B22 PE=1 SV=1	0.003	1.516	6	1	1	1	1	144	17.4	9.5	0	1
FALSE	High	Master Protein	Q9VJD1	Glucosidase 2 beta subunit, isoform A OS=Drosophila melanogaster OX=7227 GN=GCS2beta PE=1 SV=1	0.003	1.505	2	1	1	1	1	548	61.5	4.46	0	1
FALSE	High	Master Protein	A0A0B4JCZ0	Oxysterol-binding protein OS=Drosophila melanogaster OX=7227 GN=CG15684 PE=1 SV=1	0.003	1.485	1	1	1	1	1	990	108.3	8.27	0	1
FALSE	High	Master Protein	Q9V434	Asparaginyl-tRNA synthetase, isoform A OS=Drosophila melanogaster OX=7227 GN=AsnRS PE=1 SV=1	0.003	1.482	1	1	1	1	1	558	63.9	5.96	0	1
FALSE	High	Master Protein	Q7K180	LD02709p OS=Drosophila melanogaster OX=7227 GN=Map60 PE=1 SV=1	0.003	1.48	3	1	1	1	1	440	47.6	6.77	1.67	1
FALSE	High	Master Protein	Q9W141	Putative ATP synthase subunit f, mitochondrial OS=Drosophila melanogaster OX=7227 GN=ATPsynF PE=3 SV=1	0.003	1.475	10	1	1	1	1	107	12.5	10.1	1.65	1
FALSE	High	Master Protein	Q9VKD3	Cysteine desulfurase, mitochondrial OS=Drosophila melanogaster OX=7227 GN=Nfs1 PE=1 SV=1	0.003	1.474	3	1	1	1	1	462	51	8.21	0	1
FALSE	High	Master Protein	Q9VG81	RH49330p OS=Drosophila melanogaster OX=7227 GN=Sccpdh2 PE=1 SV=1	0.003	1.455	2	1	1	1	1	431	47.2	9.44	0	1
FALSE	High	Master Protein	P19889	60S acidic ribosomal protein P0 OS=Drosophila melanogaster OX=7227 GN=RpLP0 PE=1 SV=1	0.003	1.454	3	1	2	1	1	317	34.2	6.95	0	1
FALSE	High	Master Protein	Q9VC49	DNA-directed RNA polymerases I, II, and III subunit RPABC5 OS=Drosophila melanogaster OX=7227 GN=Rpb10 PE=3 SV=1	0.003	1.444	13	1	1	1	1	67	7.7	7.77	0	1
FALSE	High	Master Protein	A0A0B4K6V1	Aralar1, isoform E OS=Drosophila melanogaster OX=7227 GN=aralar1 PE=1 SV=1	0.003	1.443	1	1	1	1	1	707	78.3	9.09	0	1
FALSE	High	Master Protein	Q9VGB6	Phosphoglycerate mutase OS=Drosophila melanogaster OX=7227 GN=Pglym87 PE=3 SV=1	0.003	1.442	4	1	1	1	1	292	32.9	8.94	0	1
FALSE	High	Master Protein	Q9VXR5	LD02975p OS=Drosophila melanogaster OX=7227 GN=Dmel\CG9281 PE=1 SV=1	0.005	1.428	2	1	1	1	1	611	69.5	7.53	0	1
FALSE	High	Master Protein	Q8T8T9	AT30094p OS=Drosophila melanogaster OX=7227 GN=Css2 PE=2 SV=1	0.005	1.424	4	1	1	1	1	204	22.9	9.1	0	1
FALSE	High	Master Protein	Q9VXK7	LD31474p OS=Drosophila melanogaster OX=7227 GN=ND-20 PE=2 SV=1	0.005	1.392	4	1	1	1	1	221	24.6	9.74	0	1
FALSE	High	Master Protein	Q9W4R8	RE03721p OS=Drosophila melanogaster OX=7227 GN=Dmel\CG14270 PE=1 SV=1	0.005	1.383	6	1	1	1	1	191	22.6	8.97	0	1
FALSE	High	Master Protein	M9PB92	CCR4-NOT transcription complex subunit 4, isoform K OS=Drosophila melanogaster OX=7227 GN=Cnot4 PE=1 SV=1	0.005	1.38	1	1	1	1	1	1062	117.6	6.79	0	1
FALSE	High	Master Protein	P25843	Profilin OS=Drosophila melanogaster OX=7227 GN=chic PE=1 SV=1	0.005	1.378	7	1	1	1	1	126	13.7	5.41	1.6	1
FALSE	High	Master Protein	A0A0B4LGJ9	Glycerol-3-phosphate acyltransferase 4, isoform D OS=Drosophila melanogaster OX=7227 GN=Gpat4 PE=1 SV=1	0.005	1.377	1	1	2	1	1	537	60.6	8.22	0	1
FALSE	High	Master Protein	Q9VND7	RE50009p OS=Drosophila melanogaster OX=7227 GN=Dmel\CG2931 PE=1 SV=1	0.005	1.365	4	1	1	1	1	302	33.6	10.2	0	1
FALSE	High	Master Protein	Q9W0B8	Coatomer subunit alpha OS=Drosophila melanogaster OX=7227 GN=alphaCOP PE=1 SV=1	0.005	1.364	1	1	1	1	1	1234	139.2	7.65	0	1
FALSE	High	Master Protein	D5AEK7	1-Acylglycerol-3-phosphate O-acyltransferase 3, isoform E OS=Drosophila melanogaster OX=7227 GN=Agpat3 PE=1 SV=1	0.007	1.348	2	1	1	1	1	397	45.7	9.23	0	1
FALSE	High	Master Protein	Q7K485	CathD, isoform A OS=Drosophila melanogaster OX=7227 GN=cathD PE=1 SV=1	0.007	1.333	2	1	1	1	1	392	42.4	6.32	0	1
FALSE	High	Master Protein	Q8T0Q4	GH13992p OS=Drosophila melanogaster OX=7227 GN=shrb PE=1 SV=1	0.006	1.332	5	1	1	1	1	226	25.4	4.81	0	1
FALSE	High	Master Protein	Q9VUR3	Probable aminoacyl tRNA synthase complex-interacting multifunctional protein 2 OS=Drosophila melanogaster OX=7227 GN=AIMP2 PE=3 SV=1	0.006	1.331	2	1	1	1	1	334	36.9	8.9	1.74	1
FALSE	High	Master Protein	A0A0B4K618	Fmr1, isoform G OS=Drosophila melanogaster OX=7227 GN=Fmr1 PE=1 SV=1	0.006	1.328	1	1	1	1	1	729	81	8.7	0	1
FALSE	High	Master Protein	A0A0B4LEY6	Nascent polypeptide associated complex protein alpha subunit, isoform D OS=Drosophila melanogaster OX=7227 GN=Nacalpha PE=4 SV=1	0.006	1.327	6	1	1	1	1	217	23	4.74	2.13	1
FALSE	High	Master Protein	Q9VL70	HL08109p OS=Drosophila melanogaster OX=7227 GN=yip2 PE=1 SV=1	0.006	1.309	3	1	1	1	1	398	41.6	8.51	0	1
FALSE	High	Master Protein	Q7KTJ7	Basigin, isoform G OS=Drosophila melanogaster OX=7227 GN=Bsg PE=1 SV=1	0.006	1.309	2	1	1	1	1	648	70.5	6.89	1.74	1
FALSE	High	Master Protein	Q9VSS7	UPF0193 protein EVG1 homolog OS=Drosophila melanogaster OX=7227 GN=CG5280 PE=3 SV=1	0.006	1.3	4	1	1	1	1	250	28.5	9.61	0	1
FALSE	High	Master Protein	Q24090	GH08712p OS=Drosophila melanogaster OX=7227 GN=Snr1 PE=1 SV=2	0.006	1.299	4	1	1	1	1	370	41.9	5.27	0	1
FALSE	High	Master Protein	A0A0B4LFL2	Eukaryotic translation initiation factor 3 subunit C OS=Drosophila melanogaster OX=7227 GN=eIF3c PE=3 SV=1	0.006	1.296	1	1	1	1	1	910	105.6	6.06	0	1
FALSE	High	Master Protein	P08266	DNA-directed RNA polymerase II subunit RPB2 OS=Drosophila melanogaster OX=7227 GN=RpII140 PE=2 SV=2	0.006	1.287	1	1	1	1	1	1176	134	7.05	0	1
FALSE	High	Master Protein	Q9W3C7	Palmitoyl-protein thioesterase 1 OS=Drosophila melanogaster OX=7227 GN=Ppt1 PE=2 SV=2	0.006	1.286	3	1	1	1	1	314	35.8	7.14	0	1
FALSE	High	Master Protein	P17210	Kinesin heavy chain OS=Drosophila melanogaster OX=7227 GN=Khc PE=1 SV=2	0.006	1.281	1	1	1	1	1	975	110.3	5.77	1.7	1
FALSE	High	Master Protein	P29845	Heat shock 70 kDa protein cognate 5 OS=Drosophila melanogaster OX=7227 GN=Hsc70-5 PE=1 SV=2	0.008	1.274	2	1	1	1	1	686	74	6.35	0	1
FALSE	High	Master Protein	Q9VDC3	AP complex subunit sigma OS=Drosophila melanogaster OX=7227 GN=AP-2sigma PE=1 SV=1	0.009	1.27	5	1	2	1	1	142	17	6.18	1.65	1
FALSE	High	Master Protein	P53034	Replication factor C subunit 2 OS=Drosophila melanogaster OX=7227 GN=RfC4 PE=1 SV=1	0.009	1.267	3	1	1	1	1	331	37.2	7.72	0	1
FALSE	High	Master Protein	Q7K0E6	Aspartyl-tRNA synthetase, isoform A OS=Drosophila melanogaster OX=7227 GN=AspRS PE=1 SV=1	0.009	1.261	2	1	1	1	1	531	59	6.81	0	1
FALSE	High	Master Protein	Q95RI7	LD28068p OS=Drosophila melanogaster OX=7227 GN=SPF30 PE=1 SV=1	0.009	1.254	4	1	1	1	1	243	28.2	8.54	0	1
FALSE	High	Master Protein	Q01604	Phosphoglycerate kinase OS=Drosophila melanogaster OX=7227 GN=Pgk PE=2 SV=2	0.009	1.253	2	1	1	1	1	415	43.8	7.42	0	1
FALSE	High	Master Protein	Q9W4J5	Ribosomal RNA small subunit methyltransferase NEP1 OS=Drosophila melanogaster OX=7227 GN=CG3527 PE=3 SV=2	0.009	1.251	4	1	1	1	1	252	28.3	8.68	0	1
FALSE	High	Master Protein	Q9VHT2	FI07663p OS=Drosophila melanogaster OX=7227 GN=tex PE=1 SV=1	0.009	1.249	3	1	1	1	1	320	36.4	6.47	0	1
FALSE	High	Master Protein	M9ND19	UDP-galactose 4'-epimerase, isoform B OS=Drosophila melanogaster OX=7227 GN=Gale PE=1 SV=1	0.009	1.246	3	1	1	1	1	350	38.7	7.46	0	1
FALSE	High	Master Protein	Q9V3U6	26-29kD-proteinase OS=Drosophila melanogaster OX=7227 GN=26-29-p PE=1 SV=1	0.009	1.24	2	1	1	1	1	549	62.1	6.74	0	1
FALSE	High	Master Protein	A1Z8D0	Periodic tryptophan protein 1 homolog OS=Drosophila melanogaster OX=7227 GN=nclb PE=1 SV=1	0.009	1.233	2	1	1	1	1	459	51.4	4.39	0	1
FALSE	High	Master Protein	Q9V3F2	LD36009p OS=Drosophila melanogaster OX=7227 GN=lace PE=1 SV=1	0.009	1.223	2	1	1	1	1	597	66	7.81	0	1
FALSE	High	Master Protein	Q8SXF0	Mitochondrial ribosomal protein S9 OS=Drosophila melanogaster OX=7227 GN=mRpS9 PE=1 SV=1	0.009	1.217	2	1	1	1	1	395	45.2	8.91	0	1
FALSE	High	Master Protein	P13496	Dynactin subunit 1 OS=Drosophila melanogaster OX=7227 GN=DCTN1-p150 PE=1 SV=2	0.009	1.217	1	1	1	1	1	1265	141.1	5.62	0	1
FALSE	High	Master Protein	Q9VE85	Nucleoporin 43kD OS=Drosophila melanogaster OX=7227 GN=Nup43 PE=1 SV=1	0.009	1.215	3	1	1	1	1	358	40.1	5.22	0	1
FALSE	High	Master Protein	Q9NJH0	Elongation factor 1-gamma OS=Drosophila melanogaster OX=7227 GN=eEF1gamma PE=2 SV=2	0.009	1.214	2	1	1	1	1	431	48.9	7.05	0	1
FALSE	High	Master Protein	Q7KTL5	LD08056p OS=Drosophila melanogaster OX=7227 GN=sip2 PE=1 SV=1	0.009	1.213	2	1	1	1	1	657	72.8	5.17	0	1
FALSE	High	Master Protein	Q9VC34	GH10293p OS=Drosophila melanogaster OX=7227 GN=Dmel\CG6980 PE=2 SV=1	0.009	1.21	4	1	1	1	1	250	28.9	6.11	0	1
FALSE	High	Master Protein	Q9VAC9	Uncharacterized protein, isoform A OS=Drosophila melanogaster OX=7227 GN=cg7903 PE=4 SV=2	0.009	1.207	3	1	1	1	1	384	40.2	11.18	0	1
FALSE	High	Master Protein	Q8SYP9	Mitochondrial ribosomal protein S5, isoform A OS=Drosophila melanogaster OX=7227 GN=mRpS5 PE=1 SV=1	0.009	1.198	3	1	1	1	1	407	46	10.2	0	1
FALSE	High	Master Protein	Q9VQL0	Uncharacterized protein, isoform B OS=Drosophila melanogaster OX=7227 GN=Dmel\CG17258 PE=4 SV=2	0.009	1.19	1	1	1	1	1	876	103.9	9.38	0	1
FALSE	High	Master Protein	Q9V5P6	H/ACA ribonucleoprotein complex subunit 3 OS=Drosophila melanogaster OX=7227 GN=CG7637 PE=2 SV=1	0.009	1.187	22	1	1	1	1	64	7.6	9.92	0	1
FALSE	High	Master Protein	Q9W4K0	CHOp24, isoform A OS=Drosophila melanogaster OX=7227 GN=CHOp24 PE=1 SV=1	0.009	1.187	7	1	1	1	1	208	23.2	5.76	0	1
FALSE	High	Master Protein	P56175	Probable RNA 3'-terminal phosphate cyclase-like protein OS=Drosophila melanogaster OX=7227 GN=Rtc1 PE=2 SV=3	0.009	1.184	2	1	1	1	1	384	42.1	8.09	0	1
FALSE	High	Master Protein	Q9VSH1	GH01354p OS=Drosophila melanogaster OX=7227 GN=Sbp2 PE=2 SV=2	0.009	1.182	3	1	1	1	1	313	36	10.13	0	1
FALSE	High	Master Protein	A0A0B4KGU4	Belle, isoform B OS=Drosophila melanogaster OX=7227 GN=bel PE=4 SV=1	0.009	1.18	1	1	1	1	1	801	85.4	7.77	0	1
FALSE	High	Master Protein	P48601	26S proteasome regulatory subunit 4 OS=Drosophila melanogaster OX=7227 GN=Rpt2 PE=1 SV=2	0.009	1.169	3	1	1	1	1	439	49.3	6.58	0	1
FALSE	High	Master Protein	Q7K4Y0	Desaturase 1, isoform A OS=Drosophila melanogaster OX=7227 GN=Desat1 PE=1 SV=1	0.009	1.167	2	1	1	1	1	383	43.4	8.82	0	1
FALSE	High	Master Protein	A0A0B4KHL2	Coatomer subunit gamma OS=Drosophila melanogaster OX=7227 GN=gammaCOP PE=1 SV=1	0.009	1.163	1	1	1	1	1	897	99.4	5.3	0	1
FALSE	High	Master Protein	Q9VTV1	THO complex subunit 6 OS=Drosophila melanogaster OX=7227 GN=thoc6 PE=1 SV=1	0.009	1.163	3	1	1	1	1	350	39.2	5	0	1
FALSE	High	Master Protein	Q9W414	Regulatory particle triple-A ATPase 4 OS=Drosophila melanogaster OX=7227 GN=Rpt4 PE=1 SV=3	0.009	1.159	2	1	1	1	1	397	44.9	8.07	0	1
FALSE	High	Master Protein	Q9VCH5	Nuclear pore complex protein Nup98-Nup96 OS=Drosophila melanogaster OX=7227 GN=Nup98-96 PE=1 SV=3	0.009	1.158	0	1	1	1	1	1960	210	6.52	0	1
FALSE	High	Master Protein	Q9VTL1	PCI domain-containing protein 2 homolog OS=Drosophila melanogaster OX=7227 GN=PCID2 PE=1 SV=2	0.009	1.157	2	1	1	1	1	395	45.2	8.4	0	1
FALSE	High	Master Protein	Q9VK34	NAD-dependent histone deacetylase sirtuin-1 OS=Drosophila melanogaster OX=7227 GN=Sirt1 PE=1 SV=1	0.009	1.145	2	1	1	1	1	823	91.8	4.86	0	1
FALSE	High	Master Protein	P45975	Histone-lysine N-methyltransferase Su(var)3-9 OS=Drosophila melanogaster OX=7227 GN=Su(var)3-9 PE=1 SV=2	0.009	1.142	2	1	1	1	1	635	71.9	8.35	0	1
FALSE	High	Master Protein	Q7KNF2	Polyadenylate-binding protein 2 OS=Drosophila melanogaster OX=7227 GN=Pabp2 PE=1 SV=1	0.009	1.13	3	1	1	1	1	224	25	5.2	0	1
FALSE	High	Master Protein	Q9VTU4	Eukaryotic translation initiation factor 3 subunit L OS=Drosophila melanogaster OX=7227 GN=eIF3l PE=2 SV=1	0.009	1.122	1	1	1	1	1	539	63.2	5.96	0	1
FALSE	Medium	Master Protein	Q7JWD6	Elongin C, isoform A OS=Drosophila melanogaster OX=7227 GN=EloC PE=1 SV=1	0.01	1.115	9	1	1	1	1	117	13.1	5.05	0	1
FALSE	Medium	Master Protein	O77460	Inorganic pyrophosphatase OS=Drosophila melanogaster OX=7227 GN=Nurf-38 PE=1 SV=3	0.012	1.113	3	1	1	1	1	338	37.9	7.01	0	1
FALSE	Medium	Master Protein	Q53YH3	Calreticulin OS=Drosophila melanogaster OX=7227 GN=Calr PE=1 SV=1	0.012	1.101	2	1	1	1	1	406	46.8	4.58	1.68	1
FALSE	Medium	Master Protein	Q9VUZ0	Translocon-associated protein subunit beta OS=Drosophila melanogaster OX=7227 GN=SsRbeta PE=1 SV=2	0.012	1.097	7	1	1	1	1	190	21.2	8.72	0	1
FALSE	Medium	Master Protein	Q9VCE0	Phosphatidylserine decarboxylase proenzyme, mitochondrial OS=Drosophila melanogaster OX=7227 GN=Pisd PE=1 SV=1	0.012	1.092	3	1	1	1	1	447	50.5	9.14	0	1
FALSE	Medium	Master Protein	Q7JNE1	Non-histone chromosomal protein Prod OS=Drosophila melanogaster OX=7227 GN=prod PE=1 SV=1	0.013	1.089	2	1	1	1	1	346	39.4	5.3	0	1
FALSE	Medium	Master Protein	Q9W423	LD18904p OS=Drosophila melanogaster OX=7227 GN=schlank PE=1 SV=2	0.013	1.088	2	1	1	1	1	400	46.3	9.41	0	1
FALSE	Medium	Master Protein	Q9V9Z4	Uncharacterized protein OS=Drosophila melanogaster OX=7227 GN=Dmel\CG15564 PE=4 SV=2	0.013	1.085	5	1	1	1	1	511	56.5	9.6	0	1
FALSE	Medium	Master Protein	Q06849	ADP-ribosylation factor-like protein 2 OS=Drosophila melanogaster OX=7227 GN=Arl2 PE=2 SV=2	0.013	1.08	6	1	1	1	1	184	20.8	6.2	0	1
FALSE	Medium	Master Protein	Q9VAJ2	Bub3, isoform A OS=Drosophila melanogaster OX=7227 GN=Bub3 PE=1 SV=1	0.013	1.077	2	1	1	1	1	326	37.4	6.54	0	1
FALSE	Medium	Master Protein	Q9W457	Serine hydroxymethyltransferase OS=Drosophila melanogaster OX=7227 GN=Shmt PE=1 SV=1	0.013	1.075	3	1	1	1	1	537	58.8	9.04	0	1
FALSE	Medium	Master Protein	A0A0B4KGD0	Apontic, isoform F OS=Drosophila melanogaster OX=7227 GN=apt PE=1 SV=1	0.014	1.074	2	1	1	1	1	499	56.3	6.54	1.65	1
FALSE	Medium	Master Protein	P48612	Protein pelota OS=Drosophila melanogaster OX=7227 GN=pelo PE=2 SV=2	0.014	1.072	4	1	1	1	1	395	44.2	5.64	0	1
FALSE	Medium	Master Protein	Q8SXZ6	RE39769p OS=Drosophila melanogaster OX=7227 GN=11906 PE=2 SV=1	0.014	1.07	4	1	1	1	1	634	73.7	6.6	0	1
FALSE	Medium	Master Protein	Q9VQA5	FI08416p OS=Drosophila melanogaster OX=7227 GN=Dmel\CG17237 PE=2 SV=1	0.014	1.06	6	1	1	1	1	192	21.6	9.48	0	1
FALSE	Medium	Master Protein	B5RJJ4	LD14019p OS=Drosophila melanogaster OX=7227 GN=Dmel\CG11307 PE=2 SV=1	0.014	1.058	2	1	1	1	1	404	44.3	6.28	0	1
FALSE	Medium	Master Protein	Q9VZV8	LD46404p OS=Drosophila melanogaster OX=7227 GN=Dmel\CG16753 PE=2 SV=1	0.014	1.056	5	1	1	1	1	177	20.6	10.17	0	1
FALSE	Medium	Master Protein	P32234	GTP-binding protein 128up OS=Drosophila melanogaster OX=7227 GN=128up PE=2 SV=2	0.014	1.054	4	1	1	1	1	368	41.1	8.6	0	1
FALSE	Medium	Master Protein	Q9VHE5	RH48056p OS=Drosophila melanogaster OX=7227 GN=RpL34b PE=1 SV=1	0.014	1.054	5	1	1	1	1	168	18.4	11.52	0	1
FALSE	Medium	Master Protein	Q7K7A9	Flap endonuclease 1 OS=Drosophila melanogaster OX=7227 GN=Fen1 PE=2 SV=1	0.014	1.054	2	1	1	1	1	385	42.9	8.53	0	1
FALSE	Medium	Master Protein	Q9VJ57	Grip71 OS=Drosophila melanogaster OX=7227 GN=Grip71 PE=1 SV=2	0.014	1.047	1	1	1	1	1	646	71.7	7.05	0	1
FALSE	Medium	Master Protein	A1Z9N0	Optic atrophy 1, isoform A OS=Drosophila melanogaster OX=7227 GN=Opa1 PE=1 SV=1	0.014	1.047	1	1	1	1	1	972	111.7	8.65	0	1
FALSE	Medium	Master Protein	Q7KMP8	26S proteasome regulatory complex subunit p39A OS=Drosophila melanogaster OX=7227 GN=Rpn9 PE=1 SV=1	0.014	1.038	2	1	1	1	1	382	43.7	5.26	0	1
FALSE	Medium	Master Protein	Q9V3D0	LD33485p OS=Drosophila melanogaster OX=7227 GN=mRpL4 PE=1 SV=1	0.014	1.036	2	1	1	1	1	296	32.8	9.22	0	1
FALSE	Medium	Master Protein	Q8IPY5	Uncharacterized protein, isoform B OS=Drosophila melanogaster OX=7227 GN=CG9966 PE=4 SV=1	0.015	1.033	5	1	2	1	1	372	42.7	6	0	1
FALSE	Medium	Master Protein	Q7K0F7	Carbonyl reductase, isoform A OS=Drosophila melanogaster OX=7227 GN=Dmel\CG11200 PE=1 SV=1	0.015	1.03	2	1	1	1	1	355	39.6	9.16	1.76	1
FALSE	Medium	Master Protein	Q7KIN0	Toll-like receptor 7 OS=Drosophila melanogaster OX=7227 GN=Toll-7 PE=1 SV=1	0.022	1.024	0	1	1	1	1	1446	160.8	6.61	0	1
