# Supplementary material for: Miga-mediated endoplasmic reticulum–mitochondria contact sites regulate neuronal homeostasis
Source: eLife. 2020 Jul 10;9:e56584. doi: 10.7554/eLife.56584 (PMC7556861; doi:10.7554/eLife.56584)
Supplement: Figure 3—figure supplement 1—source data 1. [file elife-56584-fig3-figsupp1-data1.xlsx]

## Sheet: Sheet1
						Proportion of damaged muscles
						CTL	Miga	Miga FM
						0	0.374892	0.127356
						0	0.368543	0.125394
						0	0.399247	0.126384
