# Supplementary material for: Miga-mediated endoplasmic reticulum–mitochondria contact sites regulate neuronal homeostasis
Source: eLife. 2020 Jul 10;9:e56584. doi: 10.7554/eLife.56584 (PMC7556861; doi:10.7554/eLife.56584)
Supplement: Figure 3—source data 1. [file elife-56584-fig3-data1.xlsx]

## Sheet: Sheet1
No. of rhabdomeres per ommatidium				1 day
CTL	Miga	VAP33 RNAi	Miga ; VAP33 RNAi	MigaFM
7	5	7	7	7
7	5	7	7	7
6	3	7	7	7
7	6	7	6	6
6	4	7	7	7
7	5	7	7	7
7	5	6	6	6
7	5	7	7	7
7	6	7	7	6
7	5	7	7	7
6	4	7	7	7
7	5	6	7	7
