# Supplementary material for: Miga-mediated endoplasmic reticulum–mitochondria contact sites regulate neuronal homeostasis
Source: eLife. 2020 Jul 10;9:e56584. doi: 10.7554/eLife.56584 (PMC7556861; doi:10.7554/eLife.56584)
Supplement: Figure 3—source data 3. [file elife-56584-fig3-data3.xlsx]

## Sheet: Sheet1
	Mito with ER contacts/Total Mito
	CTL	Miga	PTPIP51	Tether
	0.107143	0.69	0.67	0.61
	0.0714286	0.68	0.67	0.63
	0.142857	0.69	0.58	0.68
	0.121951	0.612903	0.6	0.64
	0.1	0.736842	0.64	0.63
	0.147059	0.636364	0.78	0.69
