# Supplementary material for: Miga-mediated endoplasmic reticulum–mitochondria contact sites regulate neuronal homeostasis
Source: eLife. 2020 Jul 10;9:e56584. doi: 10.7554/eLife.56584 (PMC7556861; doi:10.7554/eLife.56584)
Supplement: Figure 3—source data 4. [file elife-56584-fig3-data4.xlsx]

## Sheet: Sheet1
		Length of ERMCS/Mito Perimeter
	CTL	Miga	PTPIP51	Tether
	0.117309	0.229092	0.226822	0.134367
	0.0670573	0.236058	0.163728	0.173777
	0.0539773	0.1976	0.143088	0.0868885
	0.0816158	0.208623	0.454801	0.166505
	0.0566038	0.254447	0.261905	0.181875
	0.191218	0.229643	0.360602	0.165511
	0.102347	0.198491	0.332856	0.208675
	0.111283	0.346933	0.177963	0.159946
	0.0529801	0.19052	0.140405	0.106035
	0.100942	0.228816	0.204545	0.109095
	0.0997426	0.213958	0.246291	0.14637
	0.123001	0.258741	0.235013	0.157699
	0.131273	0.267974	0.099819	0.147893
	0.0617647	0.276156	0.163185	0.20177
	0.129064	0.368384	0.363341	0.138927
	0.0720339	0.393519	0.259038	0.124579
