# Supplementary material for: Miga-mediated endoplasmic reticulum–mitochondria contact sites regulate neuronal homeostasis
Source: eLife. 2020 Jul 10;9:e56584. doi: 10.7554/eLife.56584 (PMC7556861; doi:10.7554/eLife.56584)
Supplement: Figure 3—source data 5. [file elife-56584-fig3-data5.xlsx]

## Sheet: Sheet1
The distance between ER and Mito at ERMCS (nm)
CTL	Miga	PTPIP51	Tether
20	8	11	22
25	9	13	15
23	8	15	15
23	8	13	9
29	9	7	14
22	9	15	8
19	9	7	9
22	12	7	8
26	12	10	7
29	11	16	10
24	12	10	9
20	8	10	8
26	12	12	8
23	9	13	9
26	11	11	9
29	14	11	5
18	12	10	5
21	13	11	8
27	10	10	9
18	8	11	6
24	9	8	9
23	12	11	9
16	11	17	5
16	13	17	4
15	14	17	9
20	13	12	9
21	14	14	11
22	14	19	14
19	13	16	16
19	11	14	9
15	6	11	9
11	9	14	8
21	9	13	8
15	12	6	8
13	14	15	6
19	8	16	6
27	6	14	5
23	7	13	7
27	9	8	6
27	11	10	8
27	12	9	6
29	10	10	10
24	13	13	5
30	18	8	5
19	13	10	6
19	14	13	6
29	10	14	8
30	14	14	9
25	13	14	7
27	13	16	9
