# Supplementary material for: Miga-mediated endoplasmic reticulum–mitochondria contact sites regulate neuronal homeostasis
Source: eLife. 2020 Jul 10;9:e56584. doi: 10.7554/eLife.56584 (PMC7556861; doi:10.7554/eLife.56584)
Supplement: Figure 3—source data 6. [file elife-56584-fig3-data6.xlsx]

## Sheet: Sheet1
No. of rhabdomeres per ommatidium				day 1
CTL	Miga	PTPIP51	Tether
7	5	6	5
7	5	6	5
6	3	6	6
7	6	6	6
6	4	6	4
7	5	6	4
7	5	5	3
7	5	5	4
7	6	5	5
7	5	4	4
6	4	6	4
7	5	6	6
