# Supplementary material for: Miga-mediated endoplasmic reticulum–mitochondria contact sites regulate neuronal homeostasis
Source: eLife. 2020 Jul 10;9:e56584. doi: 10.7554/eLife.56584 (PMC7556861; doi:10.7554/eLife.56584)
Supplement: Figure 3—source data 8. [file elife-56584-fig3-data8.xlsx]

## Sheet: Sheet1
		No. of rhabdomeres per ommatidium				day 30
		CTL	Miga	PTPIP51	Tether
		6	0	0	1
		7	0	0	0
		6	0	0	3
		7	0	1	1
		7	0	1	1
		6	0	0	1
		6	0	0	1
		6	0	0	0
		7	0	1	1
		5	0	1	3
		7	0	0	1
		6	0	0	1
