# Supplementary material for: Miga-mediated endoplasmic reticulum–mitochondria contact sites regulate neuronal homeostasis
Source: eLife. 2020 Jul 10;9:e56584. doi: 10.7554/eLife.56584 (PMC7556861; doi:10.7554/eLife.56584)
Supplement: Figure 4—source data 1. [file elife-56584-fig4-data1.xlsx]

## Sheet: Sheet1
		Mito with ER contacts/Total Mito					Length of ERMCS/Mito Perimeter				The distance between ER and Mito at ERMCS (nm)
		CTL	Miga mu				CTL	Miga mu			CTL	Miga mu
		0.107143	0.0865385				0.117309	0.09			20	28
		0.0714286	0.142857				0.0670573	0.07			25	23
		0.142857	0.111111				0.0539773	0.08			23	23
		0.121951	0.09375				0.0816158	0.09			23	16
		0.1	0.111111				0.0566038	0.08			29	16
		0.147059	0.0666667				0.191218	0.13			22	19
							0.102347	0.05			19	19
							0.111283	0.08			22	25
							0.0529801	0.06			26	25
							0.100942	0.09			29	12
							0.0997426	0.09			24	19
							0.123001	0.09			20	27
							0.131273	0.08			26	23
							0.0617647	0.12			23	24
							0.129064	0.07			26	25
							0.0720339	0.08			29	27
											18	29
											21	27
											27	20
											18	19
											24	23
											23	28
											16	27
											16	25
											15	25
											20	21
											21	23
											22	27
											19	15
											19	27
											15	23
											11	25
											21	25
											15	17
											13	22
											19	23
											27	24
											23	25
											27	25
											27	27
											27	27
											29	23
											24	16
											30	17
											19	16
											19	23
											29	15
											30	15
											25	28
											27	25
