# Supplementary material for: Miga-mediated endoplasmic reticulum–mitochondria contact sites regulate neuronal homeostasis
Source: eLife. 2020 Jul 10;9:e56584. doi: 10.7554/eLife.56584 (PMC7556861; doi:10.7554/eLife.56584)
Supplement: Figure 4—source data 2. [file elife-56584-fig4-data2.xlsx]

## Sheet: Sheet1
					Days	Miga mu; miga gDNA	Miga mu; migaFM gDNA			Survival(%)	100 flies
					1	100	100
					2	100	100
					3	100	100
					4	100	100
					5	100	100
					6	100	100
					7	100	100
					8	100	100
					9	100	100
					10	100	99.1903
					11	100	99.1903
					12	100	97.5709
					13	100	97.166
					14	100	95.1417
					15	100	91.0931
					16	100	85.83
					17	100	80.9717
					18	100	77.7328
					19	100	64.7773
					20	98.5075	55.4656
					21	97.0149	40.4858
					22	94.0299	30.7692
					23	91.0448	19.8381
					24	89.5522	12.1457
					25	85.0746	6.47773
					26	62.6866	3.64372
					27	49.2537	1.61943
					28	40.2985	0.809717
					29	35.8209	0.809717
					30	29.8507	0.404858
					31	16.4179	0.404858
					32	14.9254	0.404858
					33	14.9254	0
					34	11.9403	0
					35	4.47761	0
					36	2.98507	0
					37	2.98507	0
					38	2.98507	0
					39	1.49254	0
					40	0	0
