# Supplementary material for: Miga-mediated endoplasmic reticulum–mitochondria contact sites regulate neuronal homeostasis
Source: eLife. 2020 Jul 10;9:e56584. doi: 10.7554/eLife.56584 (PMC7556861; doi:10.7554/eLife.56584)
Supplement: Figure 4—source data 3. [file elife-56584-fig4-data3.xlsx]

## Sheet: Sheet1
			No. of rhabdomeres per ommatidium			25 day
		CTL	Miga mu	Miga mu: Miga gRes-HA	Miga mu; Miga FM gRes-HA
		7	2	7	6
		7	5	7	6
		7	3	7	6
		7	4	7	6
		7	4	7	6
		7	5	6	6
		7	5	7	6
		7	5	7	6
		7	4	7	6
		6	4	7	6
		7	6	7	6
		7	5	7	6
		7	4	7	6
		7	4	7	6
		7	3	7	6
		7	5	7	6
		7	5	7	6
		7	4	7	6
		7	5	7	6
		7	5	7	7
		7	6	7	7
		7	6	7	7
		7	5	7	7
		7	5	7	7
		7	5	7	7
		7	4	7	7
		7	3	7	7
		6	4	7	7
		6	4	7	7
		7	6	7	7
		7	4	7	7
		7	6	7	7
		7	5	7	7
		7	3	7	7
		7	5	7	7
		7	5	7	7
		7	5	7	7
		7	6	7	6
		7	3	7	6
		7	4	7	6
		7	4	7	6
		7	4	7	6
		7	5	7	7
		6	3	7	7
		7	4	7	7
		7	4	7	7
		7	5	7	7
		7	5	7	6
		7	5	7	6
		7	3	7	6
