# Supplementary material for: Miga-mediated endoplasmic reticulum–mitochondria contact sites regulate neuronal homeostasis
Source: eLife. 2020 Jul 10;9:e56584. doi: 10.7554/eLife.56584 (PMC7556861; doi:10.7554/eLife.56584)
Supplement: Figure 6—figure supplement 2—source data 1. [file elife-56584-fig6-figsupp2-data1.xlsx]

## Sheet: Sheet1
						CCCP P-Miga/Tubulin
					0h	1h	3h	6h	12h	24h
					0.159705	0.110526	0.448906	0.486566	0.533596	0.0871911
					0.20202	0.115831	0.309883	0.697395	0.48541	0.135604
					0.192409	0.0930534	0.35443	0.728143	0.46799	0.138515
