# Supplementary material for: Miga-mediated endoplasmic reticulum–mitochondria contact sites regulate neuronal homeostasis
Source: eLife. 2020 Jul 10;9:e56584. doi: 10.7554/eLife.56584 (PMC7556861; doi:10.7554/eLife.56584)
Supplement: Figure 6—figure supplement 3—source data 1. [file elife-56584-fig6-figsupp3-data1.xlsx]

## Sheet: Sheet1
					Mito with ER contacts/Total Mito
					CTL	Miga	Miga I-IIISA	Miga I-IIISE
					0.107143	0.69	0.71	0.7
					0.0714286	0.68	0.71	0.66
					0.142857	0.69	0.71	0.71
					0.121951	0.612903	0.67	0.75
					0.1	0.736842	0.73	0.72
					0.147059	0.636364	0.73	0.68
