# Supplementary material for: Miga-mediated endoplasmic reticulum–mitochondria contact sites regulate neuronal homeostasis
Source: eLife. 2020 Jul 10;9:e56584. doi: 10.7554/eLife.56584 (PMC7556861; doi:10.7554/eLife.56584)
Supplement: Figure 6—figure supplement 3—source data 2. [file elife-56584-fig6-figsupp3-data2.xlsx]

## Sheet: Sheet1
					Length of ERMCS/Mito Perimeter
					CTL	Miga	Miga I-IIISA	Miga I-IIISE
					0.117309	0.229092	0.269645	0.199663
					0.0670573	0.236058	0.14942	0.215583
					0.0539773	0.1976	0.222137	0.12724
					0.0816158	0.208623	0.545867	0.435502
					0.0566038	0.254447	0.132612	0.174009
					0.191218	0.229643	0.402911	0.277334
					0.102347	0.198491	0.182488	0.347762
					0.111283	0.346933	0.219205	0.261777
					0.0529801	0.19052	0.27944	0.311849
					0.100942	0.228816	0.27812	0.244516
					0.0997426	0.213958	0.194862	0.272242
					0.123001	0.258741	0.224278	0.25719
					0.131273	0.267974	0.218195	0.301829
					0.0617647	0.276156	0.211637	0.271983
					0.129064	0.368384	0.197226	0.219317
					0.0720339	0.393519	0.180015	0.26991
