# Supplementary material for: Miga-mediated endoplasmic reticulum–mitochondria contact sites regulate neuronal homeostasis
Source: eLife. 2020 Jul 10;9:e56584. doi: 10.7554/eLife.56584 (PMC7556861; doi:10.7554/eLife.56584)
Supplement: Figure 6—figure supplement 3—source data 3. [file elife-56584-fig6-figsupp3-data3.xlsx]

## Sheet: Sheet1
	The distance between ER and Mito at ERMCS (nm)
	CTL	Miga	Miga I-IIISA	Miga I-IIISE
	20	8	11	8
	25	9	10	8
	23	8	11	8
	23	8	12	13
	29	9	12	8
	22	9	7	13
	19	9	11	11
	22	12	13	11
	26	12	10	9
	29	11	11	13
	24	12	10	10
	20	8	11	10
	26	12	7	11
	23	9	15	10
	26	11	13	15
	29	14	9	8
	18	12	13	11
	21	13	10	12
	27	10	9	12
	18	8	12	10
	24	9	18	16
	23	12	14	15
	16	11	13	8
	16	13	10	13
	15	14	5	16
	20	13	15	8
	21	14	15	12
	22	14	14	16
	19	13	10	12
	19	11	7	11
	15	6	9	13
	11	9	9	9
	21	9	10	8
	15	12	9	8
	13	14	8	7
	19	8	11	10
	27	6	8	10
	23	7	6	14
	27	9	12	7
	27	11	11	10
	27	12	8	8
	29	10	11	11
	24	13	9	11
	30	18	10	16
	19	13	10	12
	19	14	12	14
	29	10	11	14
	30	14	10	16
	25	13	10	14
	27	13	10	6
