# Supplementary material for: Miga-mediated endoplasmic reticulum–mitochondria contact sites regulate neuronal homeostasis
Source: eLife. 2020 Jul 10;9:e56584. doi: 10.7554/eLife.56584 (PMC7556861; doi:10.7554/eLife.56584)
Supplement: Figure 6—source data 1. [file elife-56584-fig6-data1.xlsx]

## Sheet: Sheet1
				HBSS P-Miga/V5-Miga
				0h	1h	2h	4h	6h	12h
				0.100936	0.351449	1.15018	1.49482	1.59105	1.52352
				0.0939066	0.346026	1.16266	1.464	1.61421	1.53919
				0.108227	0.353959	1.17764	1.4773	1.64863	1.5352
