# Supplementary material for: Miga-mediated endoplasmic reticulum–mitochondria contact sites regulate neuronal homeostasis
Source: eLife. 2020 Jul 10;9:e56584. doi: 10.7554/eLife.56584 (PMC7556861; doi:10.7554/eLife.56584)
Supplement: Figure 6—source data 2. [file elife-56584-fig6-data2.xlsx]

## Sheet: Sheet1
			Mito with ER contacts/Total Mito
			CTL	Miga	Miga8S-A	CTL-S	Miga -S
			0.107143	0.69	0.137931	0.18	0.62
			0.0714286	0.68	0.1875	0.19	0.72
			0.142857	0.69	0.146342	0.18	0.74
			0.121951	0.612903	0.210526	0.22	0.67
			0.1	0.736842	0.136364	0.19	0.68
			0.147059	0.636364	0.214286	0.14	0.75
