# Supplementary material for: Miga-mediated endoplasmic reticulum–mitochondria contact sites regulate neuronal homeostasis
Source: eLife. 2020 Jul 10;9:e56584. doi: 10.7554/eLife.56584 (PMC7556861; doi:10.7554/eLife.56584)
Supplement: Figure 6—source data 3. [file elife-56584-fig6-data3.xlsx]

## Sheet: Sheet1
				Length of ERMCS/Mito Perimeter
			CTL	Miga	Miga8S-A	CTL-S	Miga-S
			0.117309	0.229092	0.104052	0.146585	0.33306
			0.0670573	0.236058	0.106014	0.0853081	0.310553
			0.0539773	0.1976	0.0734896	0.0979986	0.26195
			0.0816158	0.208623	0.0800772	0.0842839	0.256487
			0.0566038	0.254447	0.0566488	0.101932	0.450394
			0.191218	0.229643	0.0794702	0.134448	0.280265
			0.102347	0.198491	0.134385	0.0934677	0.338028
			0.111283	0.346933	0.0704584	0.140187	0.282722
			0.0529801	0.19052	0.0996544	0.211268	0.267573
			0.100942	0.228816	0.116482	0.113789	0.267706
			0.0997426	0.213958	0.130282	0.157892	0.269262
			0.123001	0.258741	0.0971405	0.126739	0.239008
			0.131273	0.267974	0.0847248	0.182639	0.461704
			0.0617647	0.276156	0.099616	0.136782	0.377349
			0.129064	0.368384	0.0823845	0.0927197	0.227313
			0.0720339	0.393519	0.133965	0.0616291	0.304759
