# Supplementary material for: Miga-mediated endoplasmic reticulum–mitochondria contact sites regulate neuronal homeostasis
Source: eLife. 2020 Jul 10;9:e56584. doi: 10.7554/eLife.56584 (PMC7556861; doi:10.7554/eLife.56584)
Supplement: Figure 6—source data 4. [file elife-56584-fig6-data4.xlsx]

## Sheet: Sheet1
				The distance between ER and Mito at ERMCS (nm)
				CTL	Miga	Miga8S-A	CTL-S	Miga-S
				20	8	19	21	15
				25	9	17	12	10
				23	8	12	12	10
				23	8	15	11	9
				29	9	17	11	14
				22	9	29	14	9
				19	9	25	12	10
				22	12	14	11	10
				26	12	19	16	8
				29	11	19	24	8
				24	12	22	24	11
				20	8	17	11	16
				26	12	19	30	13
				23	9	24	10	14
				26	11	22	25	14
				29	14	29	14	6
				18	12	29	23	4
				21	13	27	30	7
				27	10	22	30	4
				18	8	17	26	9
				24	9	22	30	3
				23	12	19	25	6
				16	11	25	25	6
				16	13	25	23	6
				15	14	25	23	5
				20	13	28	27	4
				21	14	19	16	6
				22	14	23	30	3
				19	13	18	16	6
				19	11	22	14	4
				15	6	27	12	14
				11	9	30	12	10
				21	9	30	13	8
				15	12	20	26	7
				13	14	17	22	8
				19	8	24	23	10
				27	6	17	20	7
				23	7	14	24	8
				27	9	29	24	11
				27	11	24	26	13
				27	12	22	19	15
				29	10	29	27	9
				24	13	22	27	15
				30	18	29	30	12
				19	13	25	20	9
				19	14	24	18	9
				29	10	27	22	4
				30	14	12	24	12
				25	13	26	26	11
				27	13	19	27	7
