# Supplementary material for: Miga-mediated endoplasmic reticulum–mitochondria contact sites regulate neuronal homeostasis
Source: eLife. 2020 Jul 10;9:e56584. doi: 10.7554/eLife.56584 (PMC7556861; doi:10.7554/eLife.56584)
Supplement: Figure 6—source data 5. [file elife-56584-fig6-data5.xlsx]

## Sheet: Sheet1
				No. of rhabdomeres per ommatidium				1 day
				CTL	Miga	MigaI-IIIS-A	MigaI-IIIS-E
				7	5	6	5
				7	5	6	5
				6	3	6	5
				7	6	5	5
				6	4	7	5
				7	5	8	0
				7	5	6	0
				7	5	7	3
				7	6	7	3
				7	5	7	5
				6	4	7	4
				7	5	6	1
