# Supplementary material for: Miga-mediated endoplasmic reticulum–mitochondria contact sites regulate neuronal homeostasis
Source: eLife. 2020 Jul 10;9:e56584. doi: 10.7554/eLife.56584 (PMC7556861; doi:10.7554/eLife.56584)
Supplement: Figure 7—source data 1. [file elife-56584-fig7-data1.xlsx]

## Sheet: Sheet1
					ERMCS/Mitochondria
				CTL	VAPB	Miga2	Miga2 mu	Miga2+VAPB	Miga2 -mu+VAPB
				0.152587	0.109511	0.589545	0.130267	0.283484	0.212047
				0.155747	0.13133	0.226292	0.107828	0.493754	0.104666
				0.141962	0.530093	0.310307	0.187066	0.261173	0.0634501
				0.154248	0.427109	0.363807	0.385454	0.400684	0.076523
				0.376503	0.229654	0.21864	0.182146	0.28421	0.20304
				0.31301	0.180498	0.161521	0.0632045	0.598847	0.215796
				0.430674	0.33873	0.272217	0.228664	0.389892	0.338374
				0.128225	0.438078	0.234762	0.119653	0.768844	0.445887
				0.134285	0.318741	0.4808	0.380938	0.291404	0.417118
				0.162534	0.412334	0.403145	0.21629	0.347682	0.0895865
				0.242161	0.271787	0.622922	0.378126	0.776954	0.368005
				0.204671	0.218962	0.533255	0.15327	0.640662	0.226612
				0.101185	0.177603	0.326772	0.120384	0.345485	0.355429
				0.111968	0.244199	0.238419	0.375931	0.39513	0.416536
				0.333333	0.231336	0.603593	0.215985	0.382365	0.0929721
				0.16887	0.188976	0.618541	0.0338461	0.552042	0.191852
				0.42069	0.192243	0.670414	0.249461	0.65005	0.0877698
				0.37507	0.35006	0.564092	0.101295	0.531326	0.361224
				0.304499	0.125895	0.66895	0.094201	0.856082	0.134125
				0.301048	0.538611	0.596877	0.243334	0.714612	0.156482
				0.157766	0.458774	0.467169	0.135499	0.618259	0.168006
				0.107361	0.366001	0.545888	0.0513019	0.643077	0.313205
				0.306264	0.215733	0.217724	0.0814249	0.391321	0.349936
				0.161461	0.434818	0.337228	0.372998	0.439636	0.118566
				0.288837	0.286461	0.540643	0.289328	0.521079	0.252637
				0.112659	0.352126	0.518519	0.428151	0.668345	0.163961
				0.107519	0.149672	0.596647	0.266481	0.513912	0.214906
				0.370799	0.216155	0.351255	0.225634	0.768716	0.137187
				0.166184	0.156367	0.213345	0.321658	0.922184	0.33197
				0.219029	0.160725	0.245208	0.378157	0.475844	0.282995
